# Supplementary material for: Effect of the electronic structure on the robustness of ruthenium(ii) bis-phenanthroline compounds for photodissociation of the co-ligand: synthesis, structural characterization, and density functional theory study
Source: Royal Society of Chemistry journal article supplement (doi:10.1039/d0nj05921h), 2021-01-01
Supplement: d0nj05921h1.pdf [file d0nj05921h1.pdf]

## Supporting Information

### **Effect of the Electronic Structure on the Robustness of Ruthenium(II) Bis-phenanthroline Compounds for Photodissociation of Co-ligand: Synthesis, Structural Characterization, and Density Functional Theory Study**

Megha S. Deshpande,<sup>\*a</sup> Sudesh M. Morajkar,<sup>a</sup> Bikshandarkoil R. Srinivasan,<sup>a</sup>

Mini Bharati Ahirwar,<sup>b</sup> and Milind M. Deshmukh<sup>\*b</sup>

<sup>a</sup>School of Chemical Sciences, Goa University, Goa 403206, India

<sup>b</sup>Department of Chemistry, Dr. Harisingh Gour Vishwavidyalaya (A Central University),  
Sagar, 470003, India

Email: [d\\_megha9@yahoo.co.in](mailto:d_megha9@yahoo.co.in), [milind.deshmukh@gmail.com](mailto:milind.deshmukh@gmail.com), [mdeshmukh@dhsu.edu.in](mailto:mdeshmukh@dhsu.edu.in)

#### **ORCID Number:**

Megha S. Deshpande: [0000-0002-4307-7898](https://orcid.org/0000-0002-4307-7898)

Milind M. Deshmukh: [0000-0003-3518-7859](https://orcid.org/0000-0003-3518-7859)

## Table of Contents

| Item | Details                                                                                                                                                                                                                                                                                      | Page No.    |
|------|----------------------------------------------------------------------------------------------------------------------------------------------------------------------------------------------------------------------------------------------------------------------------------------------|-------------|
| 1    | Fig. S1. IR spectrum of <b>1</b> .                                                                                                                                                                                                                                                           | S3          |
| 2    | Fig. S2. IR spectrum of <b>1</b> .                                                                                                                                                                                                                                                           | S3          |
| 3    | Fig. S3. <sup>1</sup> H NMR spectrum of <b>1</b> in DMSO-d <sub>6</sub> .                                                                                                                                                                                                                    | S4          |
| 4    | Fig. S4. <sup>1</sup> H NMR spectrum of <b>2</b> in CD <sub>3</sub> CN.                                                                                                                                                                                                                      | S4          |
| 5    | Fig. S5. A) Experimental absorption and B) steady state emission spectra of <b>1</b> and <b>2</b> in acetonitrile at room temperature ([Ru] = 50 μM); C) and D) TD-DFT simulated absorption spectra of <b>1</b> , <b>1a</b> , <b>2</b> and <b>2a</b> .                                       | S5          |
| 6    | Table S1. Crystal data and structure refinement for <b>2</b> .                                                                                                                                                                                                                               | S6          |
| 7    | Table S2. Selected bond lengths (Å) and bond angles (°) of <b>2</b> .                                                                                                                                                                                                                        | S6          |
| 8    | Fig. S6. The crystal structure of <b>2</b> depicts the atom labeling scheme.                                                                                                                                                                                                                 | S7          |
| 9    | Fig. S7. Packing of molecules in <b>2</b> viewed down the crystallographic 'b' axis depicting C–H...F hydrogen bonding interactions.                                                                                                                                                         | S7          |
| 10   | Table S3. Analysis of potential hydrogen bonds in <b>2</b> .                                                                                                                                                                                                                                 | S8          |
| 11   | Fig. S8. Cationic units of the composition [Ru(phen) <sub>2</sub> (phthz) <sub>2</sub> ] <sup>2+</sup> showing C–H...π interactions viewed down crystallographic 'c' axis.                                                                                                                   | S8          |
| 12   | Table S4. Analysis of C–H...π interactions for <b>2</b> .                                                                                                                                                                                                                                    | S9          |
| 13   | Table S5. Analysis of short ring-interactions with Cg–Cg distances for <b>2</b> .                                                                                                                                                                                                            | S9          |
| 14   | Table S6. Analysis of anion...π interactions for <b>2</b> .                                                                                                                                                                                                                                  | S10         |
| 15   | Fig. S9. Time-dependent UV-vis absorption spectra of <b>1</b> and <b>2</b> in acetonitrile in the dark at 37 °C.                                                                                                                                                                             | S10         |
| 16   | Fig. S10. UV-Visible absorption spectra monitoring photodissociation of <b>1</b> (50 μM) in acetonitrile upon irradiation (λ <sub>irr</sub> = 470 nm) for 0–30 min.                                                                                                                          | S11         |
| 17   | Fig. S11. UV-Visible absorption spectra monitoring photodissociation of <b>2</b> (50 μM) in acetonitrile upon irradiation (λ <sub>irr</sub> = 470 nm) for 0–20 min.                                                                                                                          | S11         |
| 19   | Fig. S12. UV-Visible absorption spectra monitoring photodissociation of <b>1</b> and <b>2</b> (50 μM) in acetonitrile and absorption spectra of <i>cis</i> -[Ru(phen) <sub>2</sub> (acetonitrile) <sub>2</sub> ](PF <sub>6</sub> ) <sub>2</sub> (50 μM) prepared separately in acetonitrile. | S12         |
| 20   | Table S7. Half-lives and quantum yield of first and second coligand ejection for compounds <b>1–2</b> in CH <sub>2</sub> Cl <sub>2</sub> with 10 mM Bu <sub>4</sub> NCl upon irradiation (λ <sub>irr</sub> = 470 nm).                                                                        | S12         |
| 21   | Fig. S13. <sup>1</sup> H NMR spectrum of <b>1</b> after irradiation for 45 min in acetonitrile-d <sub>3</sub> .                                                                                                                                                                              | S13         |
| 22   | Fig. S14. <sup>1</sup> H NMR spectrum of <b>2</b> after irradiation for 45 min in acetonitrile-d <sub>3</sub> .                                                                                                                                                                              | S14         |
| 23   | Fig. S15-S16. ESI-LC-MS of <b>1</b> and <b>2</b> after photodissociation in acetonitrile.                                                                                                                                                                                                    | S15         |
| 24   | Fig. S17-S18. ESI-LC-MS of <b>1</b> and <b>2</b> after photodissociation in CH <sub>2</sub> Cl <sub>2</sub> with 10 mM Bu <sub>4</sub> NCl.                                                                                                                                                  | S16         |
| 25   | Table S8. Photon flux determination: Experiment 1.                                                                                                                                                                                                                                           | S18         |
| 26   | Table S9. Photon flux determination: Experiment 2.                                                                                                                                                                                                                                           | S19         |
| 27   | Fig. S19. Linear regression absorbance vs. time for [Fe(phen) <sub>3</sub> ] <sup>2+</sup> complex formation.                                                                                                                                                                                | S20         |
| 28   | Table S10. Photon absorption probability (F) for <b>1-2</b> .                                                                                                                                                                                                                                | S21         |
| 29   | Fig. S20. Linear regression of moles of reactant vs. moles of photons absorbed for <b>1</b> , <b>Step 1</b> .                                                                                                                                                                                | S22         |
| 30   | Fig. S21. Linear regression of moles of reactant vs. moles of photons absorbed for <b>1</b> , <b>Step 2</b> .                                                                                                                                                                                | S22         |
| 31   | Fig. S22. Linear regression of moles of reactant vs. moles of photons absorbed for <b>2</b> , <b>Step 1</b> .                                                                                                                                                                                | S23         |
| 32   | Fig. S23. Linear regression of moles of reactant vs. moles of photons absorbed for <b>2</b> , <b>Step 2</b> .                                                                                                                                                                                | S23         |
| 33   | Fig. S24. The electron difference density plots of two low energy singlet-singlet transitions in TD-DFT calculations for <b>1–2</b> .                                                                                                                                                        | S24         |
| 34   | Fig. S25. The electron difference density plots of two low energy singlet-singlet transitions in TD-DFT calculations for <b>1a–2a</b> .                                                                                                                                                      | S25         |
| 35   | Table S11. Calculated bond lengths (Å) and bond angles (°) in the optimized geometry S <sub>0</sub> (DFT), <sup>3</sup> MLCT, <sup>3</sup> MC and <sup>3</sup> TS states of <b>1a</b> and <b>2a</b> in acetonitrile.                                                                         | S26         |
| 36   | Table S12. Selected TD-DFT singlet-singlet transitions along with oscillator strength (f) and orbital contribution in <b>1a</b> and <b>2a</b> .                                                                                                                                              | S27         |
| 37   | Fig. S26. Optimized structures and spin density plots of the triplet states for the <b>1a</b> in acetonitrile.                                                                                                                                                                               | S28         |
| 38   | Fig. S27. Optimized structures and spin density plots of the triplet states for the <b>2a</b> in acetonitrile.                                                                                                                                                                               | S28         |
| 39   | Fig. S28. Relaxed potential energy scans from the <sup>3</sup> MLCT state of A) <b>1a</b> and B) <b>1b</b> in acetonitrile for stretching the Ru–N5(coligand)Cl coordinate.                                                                                                                  | S29         |
| 40   | Fig. S29. Jablonski diagram obtained using DFT (triplets) and TD-DFT (singlets) data for <b>1a</b> and <b>2a</b> .                                                                                                                                                                           | S30         |
| 41   | Fig. S30. MO diagram for the relaxed PES scan of the triplet state of <b>1a</b> in acetonitrile along the Ru–N5(isoq)Cl coordinate.                                                                                                                                                          | S30         |
| 42   | Fig. S31. MO diagram for the relaxed PES scan of the triplet state of <b>2a</b> in acetonitrile along the Ru–N5(phthz)Cl coordinate.                                                                                                                                                         | S31         |
| 43   | Optimized Geometries of <b>1</b> , <b>2</b> , <b>1a</b> , <b>2a</b> corresponding to S <sub>0</sub> , <sup>3</sup> MLCT, <sup>3</sup> MC and <sup>3</sup> TS                                                                                                                                 | S32-<br>S47 |

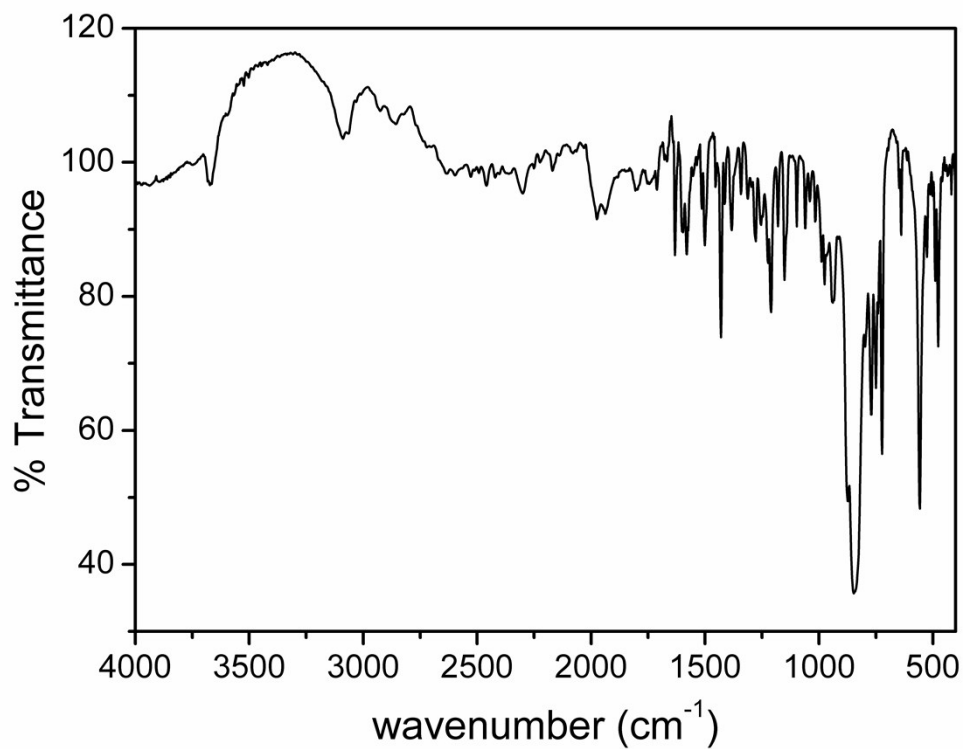

**Fig. S1.** IR spectrum of **1**.

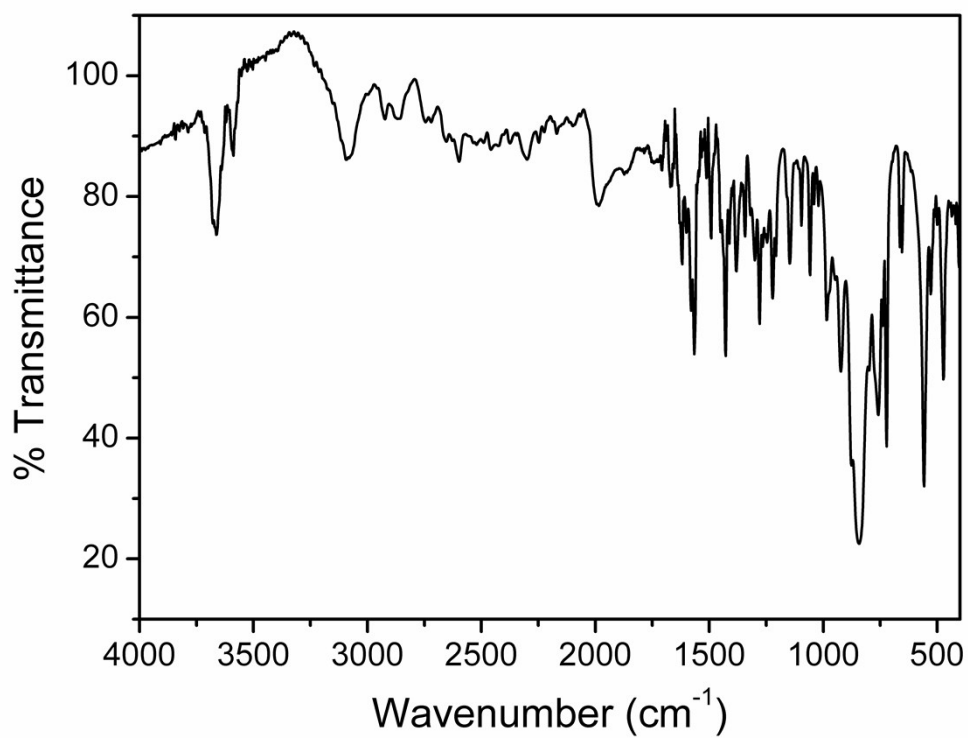

**Fig. S2.** IR spectrum of **2**.

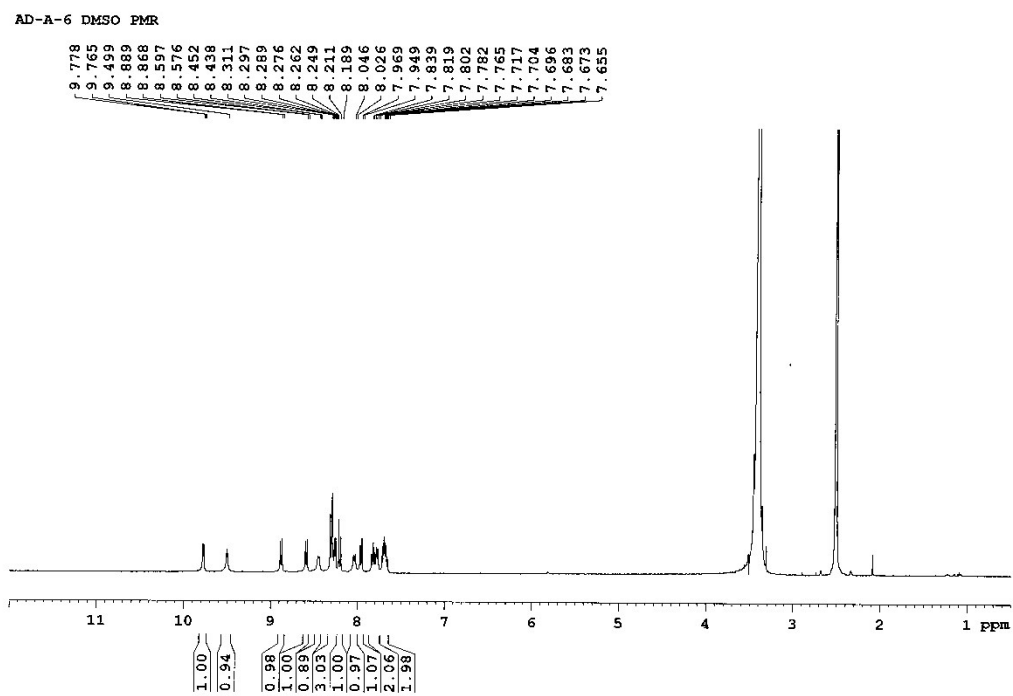

Fig. S3.  $^1\text{H}$  NMR spectrum of **1** in  $\text{DMSO-d}_6$ .

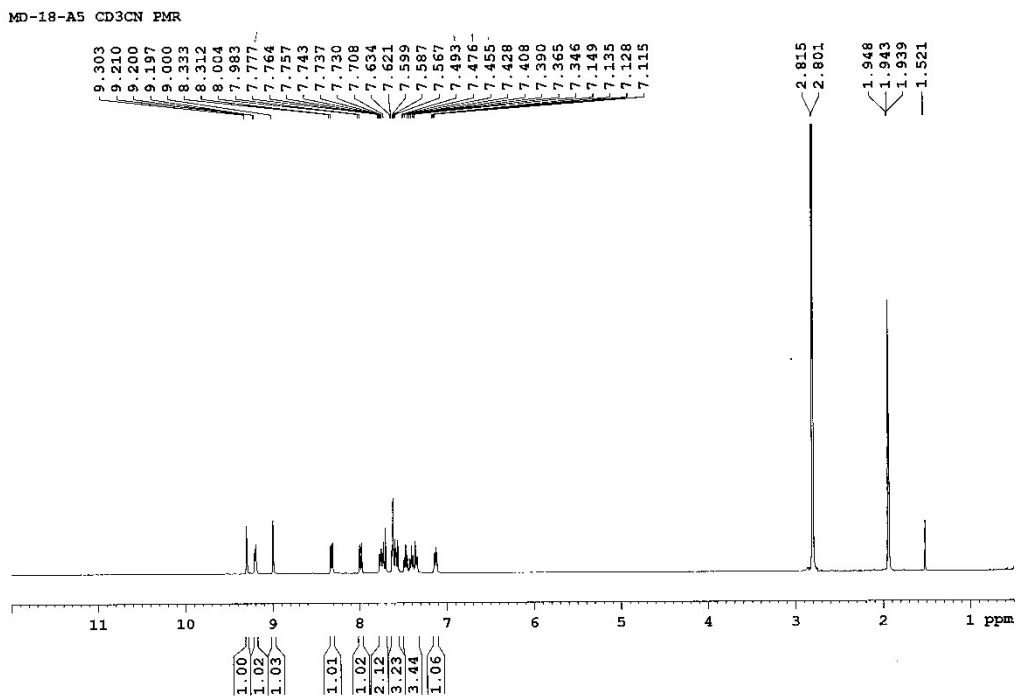

Fig. S4.  $^1\text{H}$  NMR spectrum of **2** in  $\text{CD}_3\text{CN}$ .

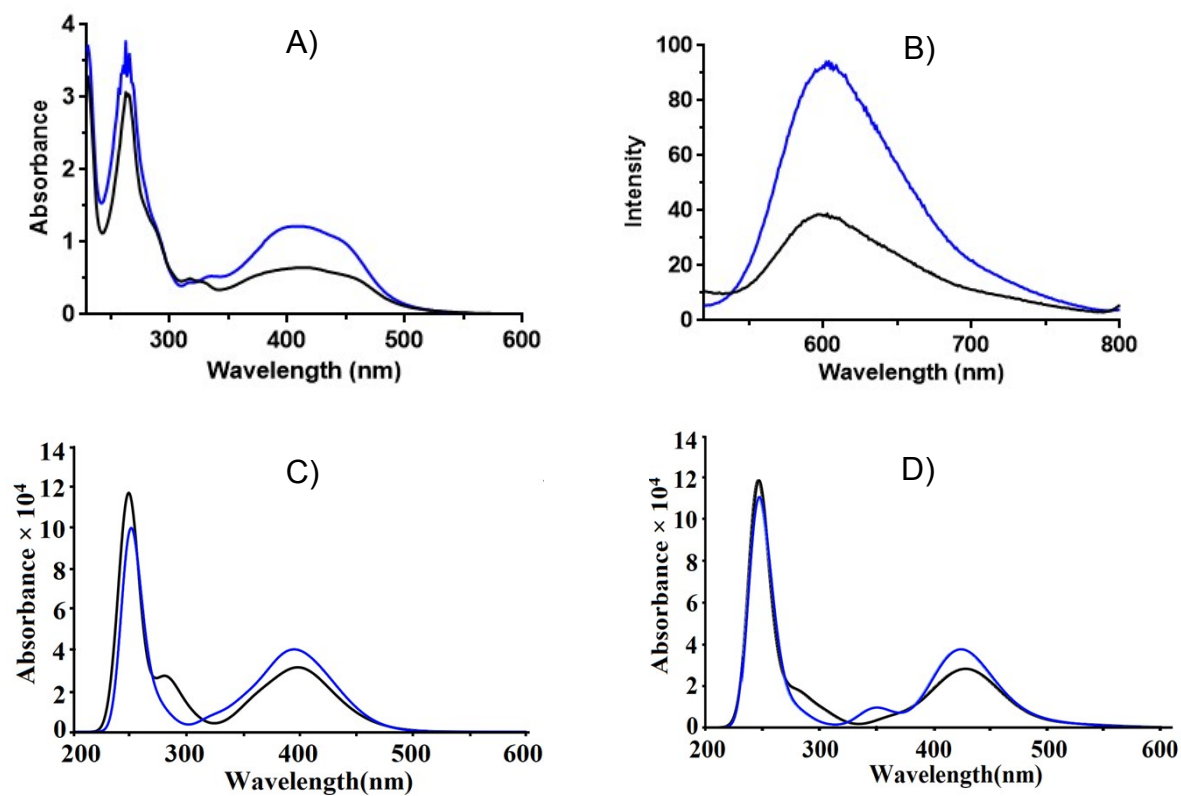

**Fig. S5.** A) Experimental absorption and B) steady state emission spectra of **1** (black line) and **2** (blue line) in acetonitrile at room temperature ( $[\text{Ru}] = 50 \mu\text{M}$ ); C) TD-DFT simulated absorption spectra of **1** and **2**; D) TD-DFT simulated absorption spectra of **1a** and **2a** in acetonitrile.

**Table S1.** Crystal data and structure refinement for **2**.

|                                                                                      |                                                                                  |                |  |
|--------------------------------------------------------------------------------------|----------------------------------------------------------------------------------|----------------|--|
| Empirical formula                                                                    | C <sub>40</sub> H <sub>28</sub> F <sub>12</sub> N <sub>8</sub> P <sub>2</sub> Ru |                |  |
| Formula weight                                                                       | 1011.71                                                                          |                |  |
| <i>T</i> (K)                                                                         | 293(2)                                                                           |                |  |
| $\lambda$ (Å)                                                                        | 0.71073                                                                          |                |  |
| Crystal system                                                                       | Orthorhombic                                                                     |                |  |
| Space group                                                                          | Pna2 <sub>1</sub>                                                                |                |  |
| Unit cell dimensions                                                                 | <i>a</i> = 18.6540(5) Å                                                          | $\alpha$ = 90° |  |
|                                                                                      | <i>b</i> = 10.7253(3) Å                                                          | $\beta$ = 90°  |  |
|                                                                                      | <i>c</i> = 20.2024(6) Å                                                          | $\gamma$ = 90° |  |
| <i>V</i> (Å <sup>3</sup> )                                                           | 4041.9(2)                                                                        |                |  |
| <i>Z</i>                                                                             | 4                                                                                |                |  |
| <i>d</i> <sub>calc</sub> (g/cm <sup>3</sup> )                                        | 1.663                                                                            |                |  |
| $\mu$ (MoK $\alpha$ ) (mm <sup>-1</sup> )                                            | 0.565                                                                            |                |  |
| <i>F</i> (000)                                                                       | 2024                                                                             |                |  |
| $\theta$ range (°)                                                                   | 2.98 to 27.48                                                                    |                |  |
| Reflections collected/unique                                                         | 35415/8723 [ <i>R</i> (int) = 0.0253]                                            |                |  |
| Completeness to $\theta$                                                             | 99.6 %                                                                           |                |  |
| Refinement method                                                                    | Full-matrix least-squares on <i>F</i> <sup>2</sup>                               |                |  |
| Data/restraints/parameters                                                           | 8723/1/568                                                                       |                |  |
| GOF on <i>F</i> <sup>2</sup>                                                         | 1.051                                                                            |                |  |
| <i>R</i> <sub>1</sub> , <i>wR</i> <sub>2</sub> [ <i>I</i> > 2 $\sigma$ ( <i>I</i> )] | <i>R</i> <sub>1</sub> = 0.0289, <i>wR</i> <sub>2</sub> = 0.0672                  |                |  |
| <i>R</i> <sub>1</sub> , <i>wR</i> <sub>2</sub> (all data)                            | <i>R</i> <sub>1</sub> = 0.0356, <i>wR</i> <sub>2</sub> = 0.0732                  |                |  |
| Largest diff. peak and hole                                                          | 0.407 and -0.395                                                                 |                |  |

**Table S2.** Selected bond lengths (Å) and bond angles (°) of **2**.

| Bond lengths (Å) |            |             |            |
|------------------|------------|-------------|------------|
| Phenanthroline   |            | Phthalazine |            |
| Ru1–N1           | 2.075(3)   | Ru1–N5      | 2.084(3)   |
| Ru1–N2           | 2.063(3)   | Ru1–N6      | 2.079(3)   |
| Ru1–N3           | 2.072(3)   |             |            |
| Ru1–N4           | 2.063(3)   |             |            |
| Bond angles (°)  |            |             |            |
| N4–Ru1–N2        | 95.24(13)  | N3–Ru1–N6   | 173.90(13) |
| N4–Ru1–N3        | 79.93(12)  | N1–Ru1–N6   | 86.33(13)  |
| N2–Ru1–N3        | 84.38(12)  | N4–Ru1–N5   | 87.72(13)  |
| N4–Ru1–N1        | 174.91(13) | N2–Ru1–N5   | 174.20(13) |
| N2–Ru1–N1        | 79.84(13)  | N3–Ru1–N5   | 91.24(12)  |
| N3–Ru1–N1        | 98.20(13)  | N1–Ru1–N5   | 97.08(14)  |
| N4–Ru1–N6        | 95.22(12)  | N6–Ru1–N5   | 92.27(12)  |
| N2–Ru1–N6        | 92.43(13)  |             |            |

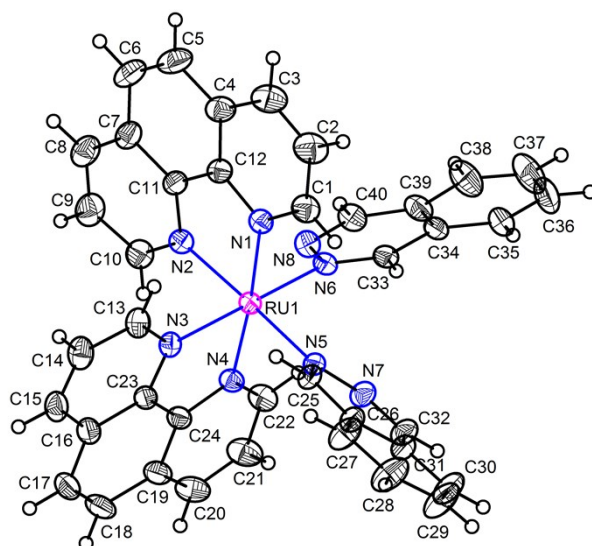

**Fig. S6.** The crystal structure of **2** depicts the atom labeling scheme. Displacement ellipsoids are drawn at the 30 % probability level (Counter anions  $\text{PF}_6^-$  are omitted for clarity).

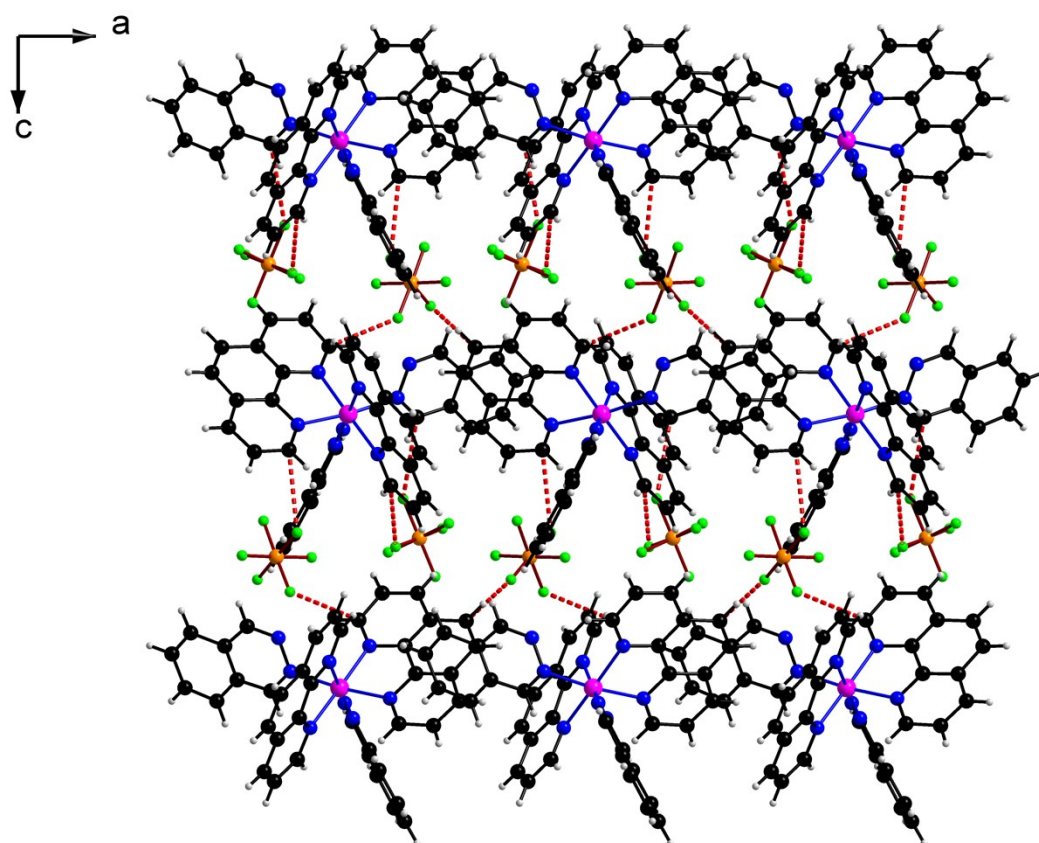

**Fig. S7.** Packing of molecules in **2** viewed down the crystallographic '*b*' axis depicting C–H...F hydrogen bonding interactions.

**Table S3.** Analysis of potential hydrogen bonds in **2**.

| Donor–H...Acceptor          | D–H  | H...A | D–A       | D–H...A |
|-----------------------------|------|-------|-----------|---------|
| C1–H1...F8 <sup>i</sup>     | 0.93 | 2.51  | 3.2461(1) | 137     |
| C13–H13...F2 <sup>i</sup>   | 0.93 | 2.49  | 3.1414(1) | 128     |
| C18–H18...F5 <sup>ii</sup>  | 0.93 | 2.41  | 3.1923(1) | 142     |
| C22–H22...F6 <sup>iii</sup> | 0.93 | 2.37  | 3.1935(1) | 147     |
| C29–H29...F2 <sup>iv</sup>  | 0.93 | 2.52  | 3.2205(1) | 132     |
| C33–H33...F7 <sup>i</sup>   | 0.93 | 2.48  | 3.3745(1) | 160'    |

Translation of ARU-code to CIF and equivalent position code.

<sup>i</sup>1/2-x,-1/2+y,1/2+z; <sup>ii</sup> 1/2+x,1/2-y,z; <sup>iii</sup> x,-1+y,z; <sup>iv</sup> 1/2-x,-3/2+y,1/2+z

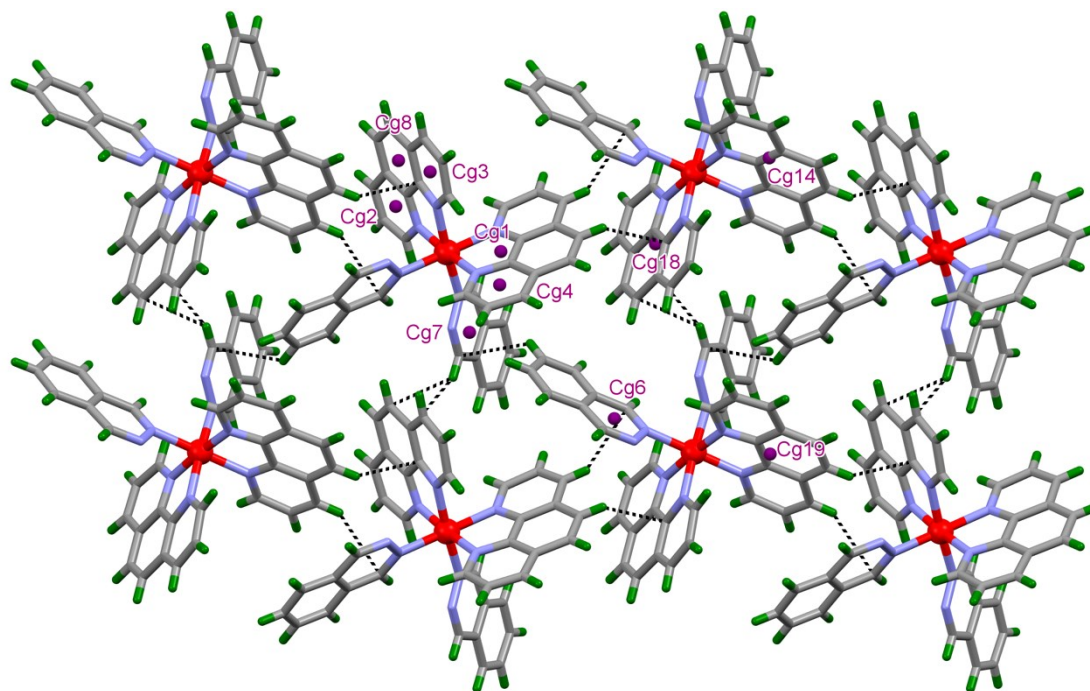

**Fig. S8.** Cationic units of the composition [Ru(phen)<sub>2</sub>(phthz)<sub>2</sub>]<sup>2+</sup> showing C–H... $\pi$  interactions viewed down crystallographic 'c' axis.



**Table S4.** Analysis of C–H $\cdots\pi$  interactions (H $\cdots$ Cg < 4 Å,  $\gamma$  < 40°) for **2**.

| X–H(I) Res(I) Cg(J)                | H $\cdots$ Cg | H–Perp | $\gamma$ | X–H $\cdots$ Cg | X $\cdots$ Cg |
|------------------------------------|---------------|--------|----------|-----------------|---------------|
| C10–H10 [1] -> Cg2 <sup>i</sup>    | 2.80          | 2.67   | 17.91    | 98              | 3.0734(1)     |
| C13–H13 [1] -> Cg1 <sup>i</sup>    | 2.90          | 2.78   | 16.71    | 97              | 3.1593(1)     |
| C15–H15 [1] -> Cg3 <sup>ii</sup>   | 2.96          | -2.93  | 8.16     | 123             | 3.5495(1)     |
| C15–H15 [1] -> Cg8 <sup>ii</sup>   | 2.78          | 2.73   | 10.36    | 128             | 3.4329(1)     |
| C17–H17 [1] -> Cg4 <sup>ii</sup>   | 2.98          | -2.77  | 21.46    | 139             | 3.7324(1)     |
| C17–H17 [1] -> Cg14 <sup>ii</sup>  | 2.77          | -2.76  | 5.76     | 125             | 3.3920(1)     |
| C17–H17 [1] -> Cg19 <sup>ii</sup>  | 2.93          | -2.76  | 19.55    | 123             | 3.5264(1)     |
| C36–H36 [1] -> Cg7 <sup>iii</sup>  | 2.77          | 2.71   | 11.77    | 149             | 3.5973(1)     |
| C36–H36 [1] -> Cg17 <sup>iii</sup> | 2.95          | 2.72   | 22.92    | 140             | 3.7150(1)     |

Symmetry transformations used to generate equivalent atoms: <sup>i</sup> X,Y,Z; <sup>ii</sup> 1/2+X,1/2-Y,Z;<sup>iii</sup> -1/2+X,-1/2-Y,Z; Where Cg1 = Ru1–N1–C12–C11–N2; Cg2 = Ru1–N3–C23–C24–N4; Cg3 = N1–C1–C2–C3–C4–C12; Cg4 = N2–C10–C9–C8–C7–C11; Cg7 = N5–N7–C32–C31–C26–C25; Cg8 = N6–N8–C40–C39–C34–C33; Cg14 = N2–C10–C9–C8–C7–C6–C5–C4–C12–C11; Cg17 = N5–N7–C32–C31–C30–C29–C28–C27–C26–C25; Cg19 = N1–C1–C2–C3–C4–C5–C6–C7–C8–C9–C10–N2–C11–C12**Table S5.** Analysis of short ring–interactions with Cg–Cg distances < 4.4 Å,  $\alpha$  < 20° and  $\beta$  < 60° for **2**.

| Cg(I) Res(I) Cg(J)             | Cg–Cg     | <i>A</i> | <i>B</i> | $\gamma$ | CgI_Perp | CgJ_Perp |
|--------------------------------|-----------|----------|----------|----------|----------|----------|
| Cg1 [1] -> Cg5 <sup>i</sup>    | 3.9377(1) | 78       | 31.9     | 69.6     | 1.3726   | 3.3419   |
| Cg1 [1] -> Cg8 <sup>i</sup>    | 3.8249(1) | 87       | 26.7     | 63       | 1.7375   | 3.4165   |
| Cg1 [1] -> Cg15 <sup>i</sup>   | 4.3768(1) | 78       | 47.1     | 72.2     | 1.3401   | 2.9787   |
| Cg2 [1] -> Cg4 <sup>i</sup>    | 3.8839(1) | 78       | 29.6     | 70.5     | 1.2946   | 3.3767   |
| Cg2 [1] -> Cg7 <sup>i</sup>    | 3.8574(1) | 89       | 27.1     | 63.2     | 1.7406   | 3.4351   |
| Cg2 [1] -> Cg14 <sup>i</sup>   | 4.3639(1) | 79       | 44.7     | 74.1     | 1.1967   | 3.1017   |
| Cg2 [1] -> Cg19 <sup>i</sup>   | 4.2544(1) | 80       | 58.7     | 74.7     | 1.1246   | 2.2113   |
| Cg5 [1] -> Cg18 <sup>vii</sup> | 4.4577(1) | 47       | 50.6     | 8        | 4.4148   | 2.8312   |
| Cg9 [1] -> Cg10 <sup>ii</sup>  | 4.3915(1) | 40       | 13.9     | 50.7     | 2.783    | 4.2636   |
| Cg9 [1] -> Cg15 <sup>ii</sup>  | 4.4192(1) | 39       | 12.2     | 50.4     | 2.8181   | 4.3195   |
| Cg10 [1] -> Cg9 <sup>vii</sup> | 4.3915(1) | 40       | 50.7     | 13.9     | 4.2636   | 2.783    |
| Cg15 [1] -> Cg9 <sup>vii</sup> | 4.4192(1) | 39       | 50.4     | 12.2     | 4.3195   | 2.8181   |
| Cg18 [1] -> Cg5 <sup>ii</sup>  | 4.4577(1) | 47       | 8        | 50.6     | 2.8312   | 4.4148   |

Symmetry transformations used to generate equivalent atoms: <sup>i</sup> X,Y,Z; <sup>ii</sup> -1/2+X,1/2-Y,Z; <sup>iii</sup> 1/2+X,-1/2-Y,Z; <sup>iv</sup> 1/2-X,1/2+Y,1/2+Z; <sup>v</sup> X,1+Y,Z; <sup>vi</sup> 1/2-X,1/2+Y,-1/2+Z; <sup>vii</sup> 1/2+X,1/2-Y,Z; <sup>viii</sup> 1/2-X,-1/2+Y,1/2+Z; <sup>ix</sup> -1/2+X,-1/2-Y,Z, <sup>x</sup> X,-1+Y,Z Where Cg1 = Ru1–N1–C12–C11–N2; Cg2 = Ru1–N3–C23–C24–N4; Cg4 = N2–C10–C9–C8–C7–C11; Cg5 = N3–C13–C14–C15–C16–C23; Cg7 = N5–N7–C32–C31–C26–C25; Cg8 = N6–N8–C40–C39–C34–C33; Cg9 = C4–C5–C6–C7–C11–C12; Cg10 = C16–C17–C18–C19–C24–C23; Cg14 = N2–C10–C9–C8–C7–C6–C5–C4–C12–C11; Cg15 = N3–C13–C14–C15–C16–C17–C18–C19–C24–C23; Cg18 = N6–N8–C40–C39–C38–C37–C36–C35–C34–C33; Cg19 = N1–C1–C2–C3–C4–C5–C6–C7–C8–C9–C10–N2–C11–C12

**Table S6.** Analysis of anion $\cdots\pi$  interactions ( $X\cdots Cg < 4.0 \text{ \AA}$ ,  $\gamma < 30^\circ$ ) for **2**.

| Y-X(I) Res(I) Cg(J)               | X $\cdots$ Cg | X-Perp | $\gamma$ | Y-X $\cdots$ Cg | Y $\cdots$ Cg |
|-----------------------------------|---------------|--------|----------|-----------------|---------------|
| P1-F6 [2] -> Cg8 <sup>i</sup>     | 3.3836(1)     | -3.144 | 21.68    | 139.89(1)       | 4.6918(1)     |
| P1-F6 [2] -> Cg18 <sup>i</sup>    | 3.6355(1)     | -3.153 | 29.86    | 124.85(1)       | 4.7096(1)     |
| P2-F7 [3] -> Cg7 <sup>ii</sup>    | 3.1209(1)     | -3.101 | 6.41     | 137.75(1)       | 4.4057(1)     |
| P2-F7 [3] -> Cg17 <sup>ii</sup>   | 3.3197(1)     | -3.096 | 21.18    | 118.78(1)       | 4.2968(1)     |
| P2-F10 [3] -> Cg10 <sup>iii</sup> | 3.4160(1)     | 3.260  | 17.38    | 135.70(1)       | 4.6430(1)     |
| P2-F10 [3] -> Cg16 <sup>iii</sup> | 3.6243(1)     | 3.262  | 25.85    | 117.08(1)       | 4.5363(1)     |
| P2-F10 [3] -> Cg20 <sup>iii</sup> | 3.7319(1)     | 3.248  | 29.49    | 130.83(1)       | 4.8785(1)     |
| P2-F12 [3] -> Cg6 <sup>iii</sup>  | 3.6428(1)     | 3.557  | 12.45    | 127.58(1)       | 4.7478(1)     |
| P2-F12 [3] -> Cg11 <sup>ii</sup>  | 3.4837(1)     | -3.462 | 6.45     | 123.35(1)       | 4.5233(1)     |
| P2-F12 [3] -> Cg16 <sup>iii</sup> | 3.7376(1)     | 3.541  | 18.68    | 111.36(1)       | 4.5363(1)     |
| P2-F12 [3] -> Cg17 <sup>ii</sup>  | 3.6396(1)     | -3.469 | 17.63    | 104.50(1)       | 4.2968(1)     |

Symmetry transformations used to generate equivalent atoms: <sup>i</sup> X,1+Y,Z; <sup>ii</sup> 1/2-X,1/2+Y,-1/2+Z; <sup>iii</sup> X,Y,Z; Where Cg6 = N4-C22-C21-C20-C19-C24; Cg7 = N5-N7-C32-C31-C26-C25; Cg8 = N6-N8-C40-C39-C34-C33; Cg10 = C16-C17-C18-C19-C24-C23; Cg11 = C26-C27-C28-C29-C30-C31; Cg16 = N4-C22-C21-C20-C19-C18-C17-C16-C23-C24; Cg17 = N5-N7-C32-C31-C30-C29-C28-C27-C26-C25; Cg18 = N6-N8-C40-C39-C38-C37-C36-C35-C34-C33

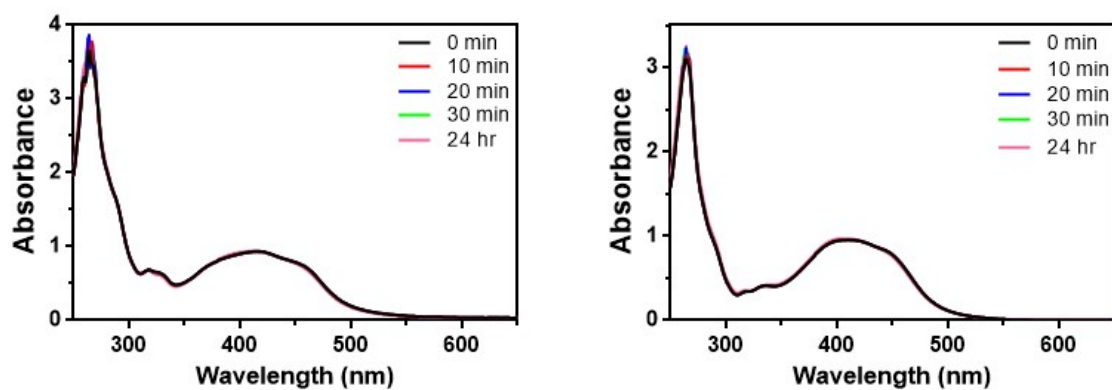**Fig. S9.** Time-dependent UV-vis absorption spectra of **1** and **2** in acetonitrile in the dark at 37 °C.

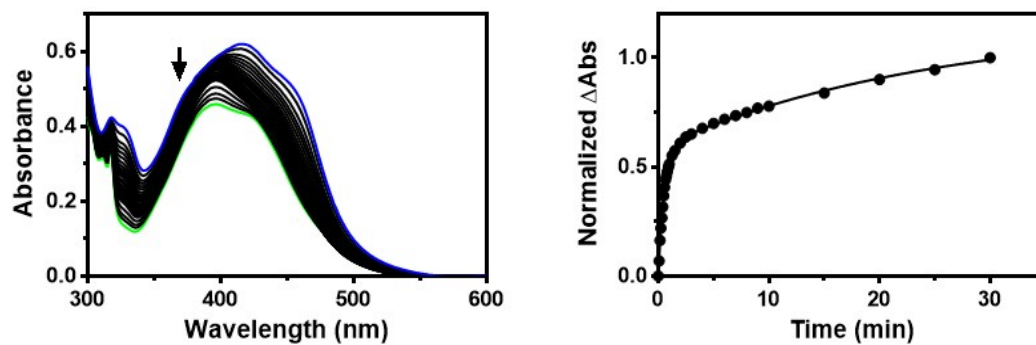

**Fig. S10.** UV-Visible absorption spectra monitoring photodissociation of **1** (50  $\mu$ M) in acetonitrile upon irradiation ( $\lambda_{\text{irr}} = 470$  nm) for 0–30 min; 0 min (blue line), 30 min (green line). The normalized change in extinction coefficient was plotted versus time and fitted to a bi-exponential equation using Prism software.

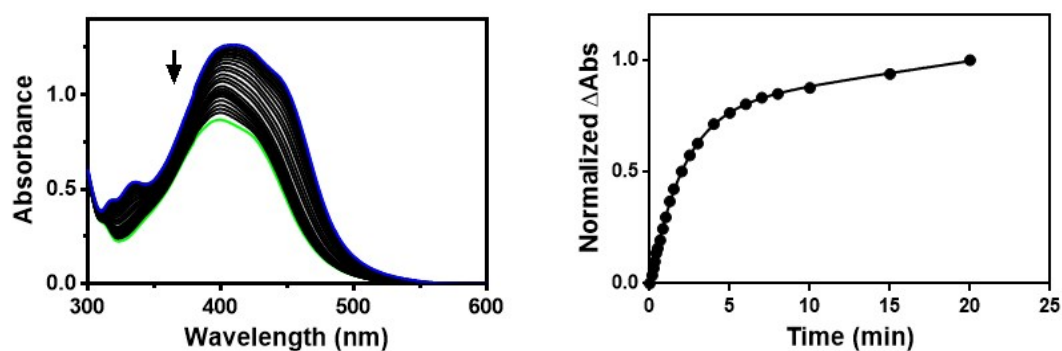

**Fig. S11.** UV-Visible absorption spectra monitoring photodissociation of **2** (50  $\mu$ M) in acetonitrile upon irradiation ( $\lambda_{\text{irr}} = 470$  nm) for 0–35 min; 0 min (blue line), 35 min (green line). The normalized change in extinction coefficient was plotted versus time and fitted to a mono exponential equation using Prism software.

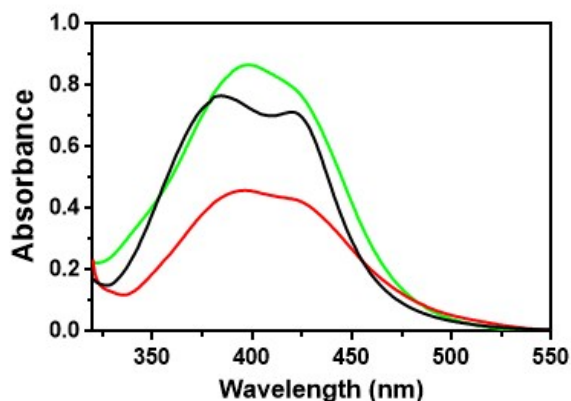

**Fig. S12.** UV-Visible absorption spectra monitoring photodissociation of **1** and **2** (50  $\mu\text{M}$ ) in acetonitrile upon irradiation ( $\lambda_{\text{irr}} = 470 \text{ nm}$ ) **1**: 30 min (red line); **2**: 35 min (green line) and absorption spectra of *cis*-[Ru(phen)<sub>2</sub>(acetonitrile)<sub>2</sub>](PF<sub>6</sub>)<sub>2</sub> (50  $\mu\text{M}$ ) prepared separately in acetonitrile in the dark at 37 °C (black line).

**Table S7.** Half-lives and quantum yields of first and second co-ligand dissociation for compounds **1–2** in CH<sub>2</sub>Cl<sub>2</sub> with 10 mM Bu<sub>4</sub>NCl upon irradiation ( $\lambda_{\text{irr}} = 470 \text{ nm}$ ).

|          | $t_{1/2}$ (first step) | $t_{1/2}$ (second step) | $\phi_{\text{ps}}$ |       |
|----------|------------------------|-------------------------|--------------------|-------|
|          | min                    | min                     | (1)                | (2)   |
| <b>1</b> | 1.49                   | 3.08                    | 0.19               | 0.031 |
| <b>2</b> | 2.17                   | 5.75                    | 0.16               | 0.018 |

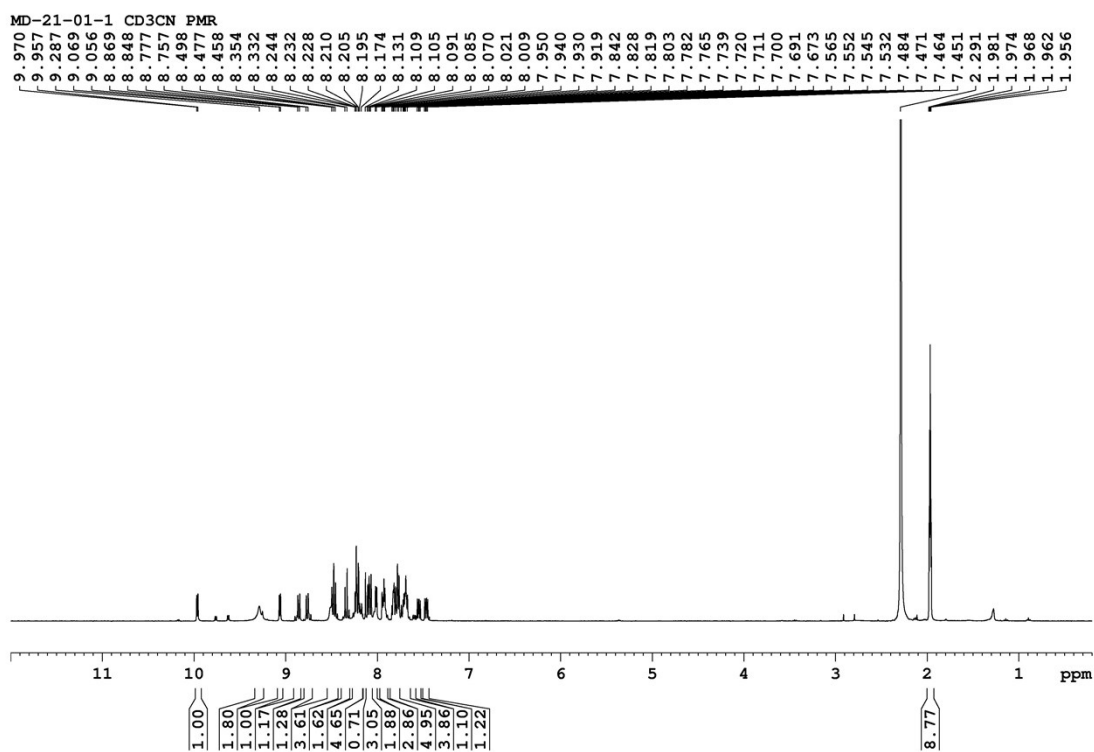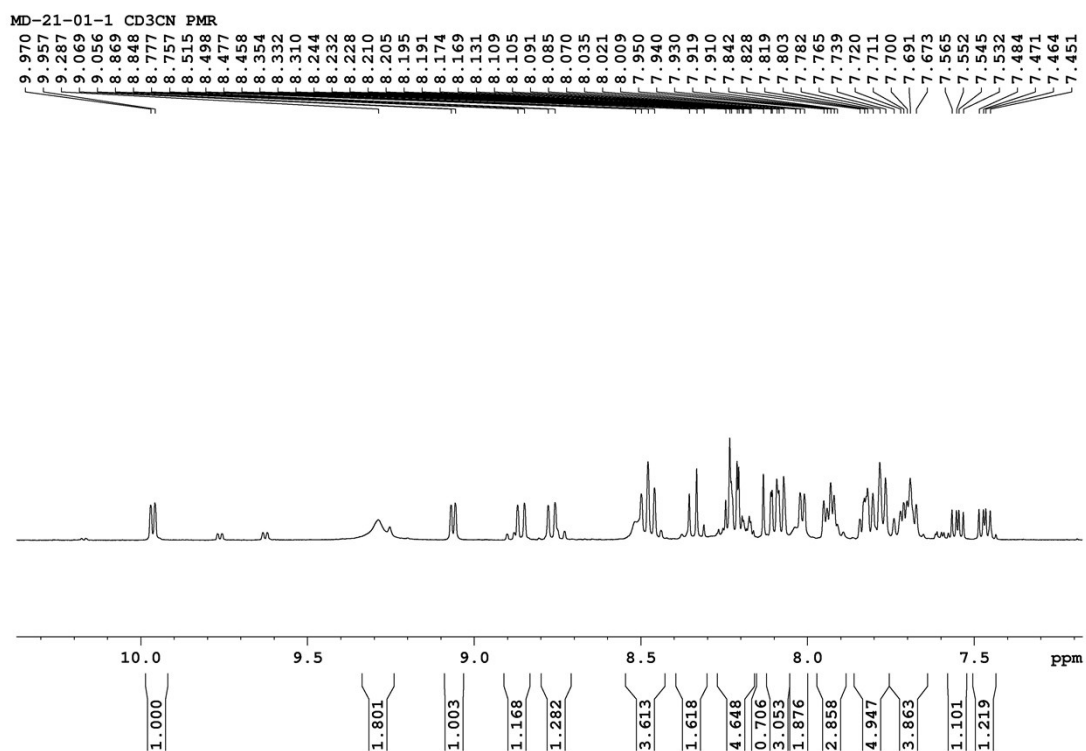

Fig. S13.  $^1\text{H}$  NMR spectrum of **1** after irradiation for 45 min in acetonitrile- $d_3$ .

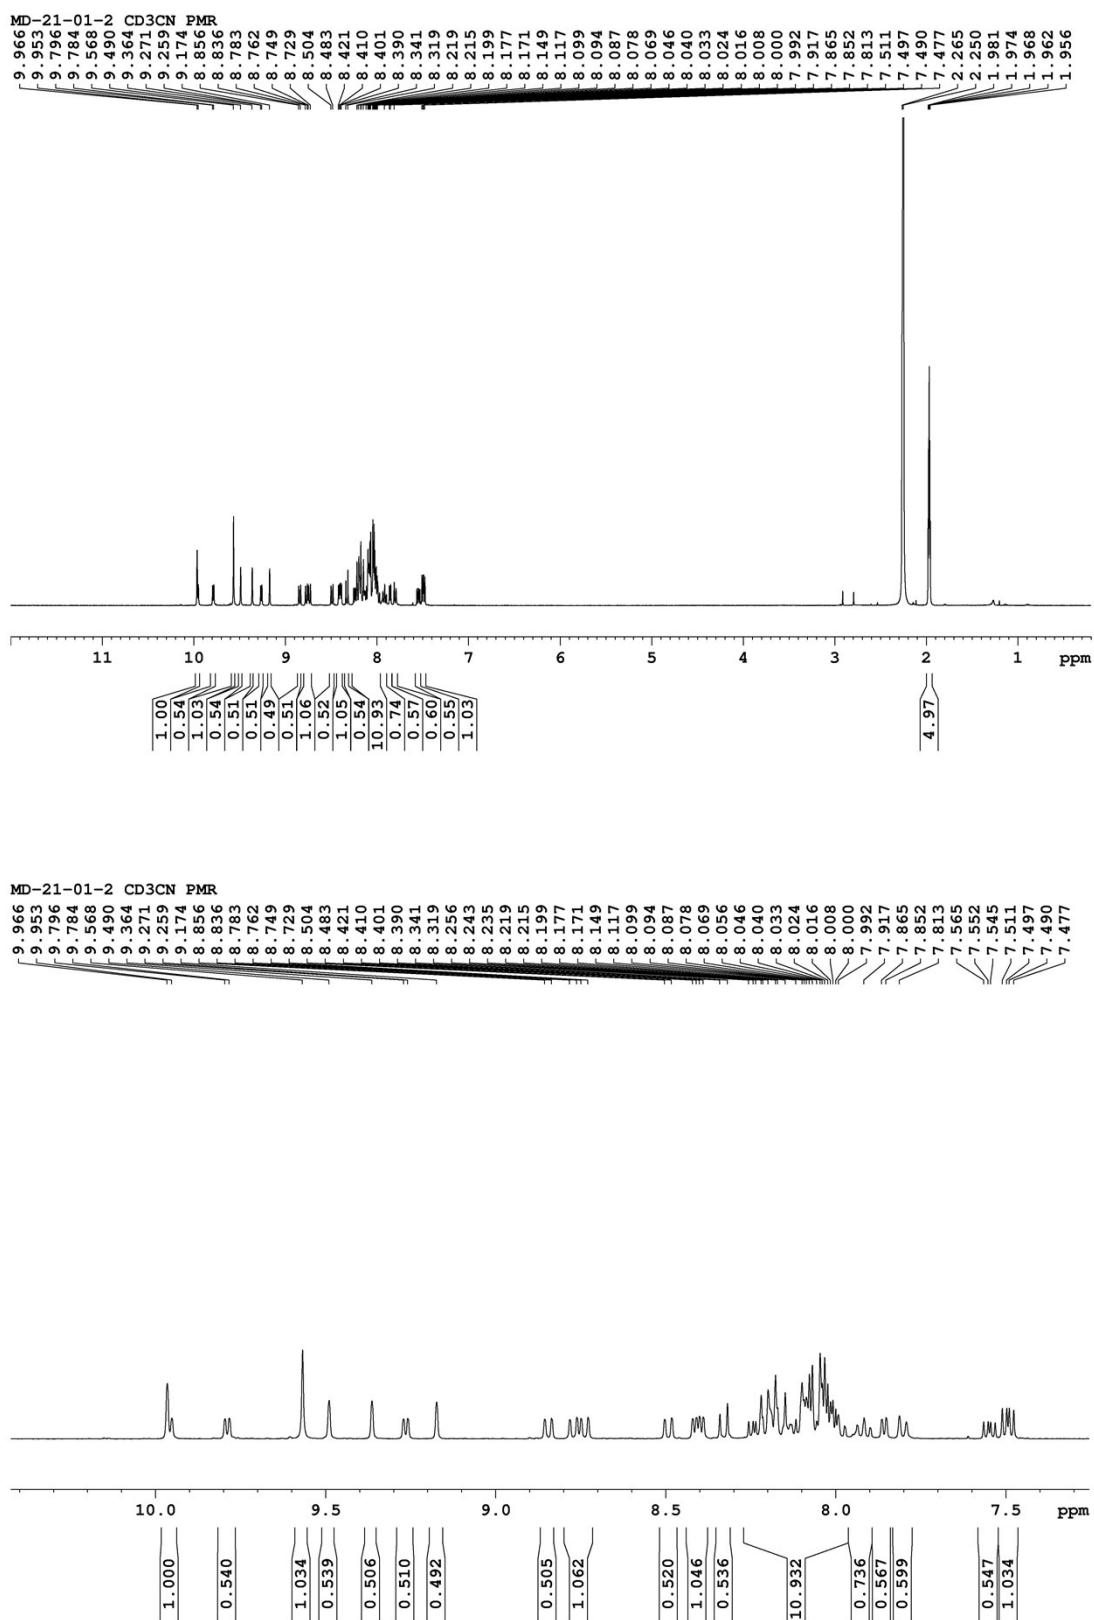

**Fig. S14.**  $^1H$  NMR spectrum of **2** after irradiation for 45 min in acetonitrile- $d_3$ .

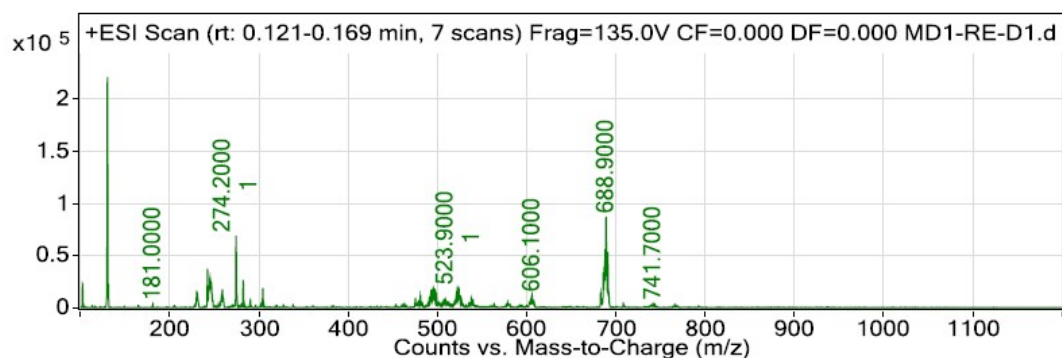

**Fig. S15.** ESI-LC-MS of **1** after photodissociation in acetonitrile upon irradiation ( $\lambda_{\text{irr}} = 470$  nm) for 30 min; The ion at  $m/z$  130 is the isoquinoline ligand liberated from the compound. The ion at  $m/z$  688.9 is the  $\text{PF}_6^-$  salt of the  $[\text{Ru}(\text{phen})_2(\text{CH}_3\text{CN})_2]$  compound and the ion at  $m/z$  606.1 is the ligand deficient  $\text{PF}_6^-$  salt of the  $[\text{Ru}(\text{phen})_2]$  compound.

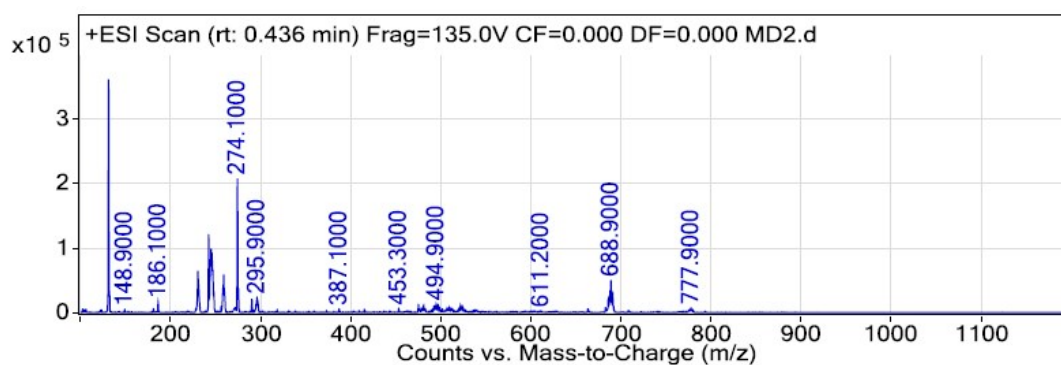

**Fig. S16.** ESI-LC-MS of **2** after photodissociation in acetonitrile upon irradiation ( $\lambda_{\text{irr}} = 470$  nm) for 35 min; The ion at  $m/z$  131 is the phthalazine ligand liberated from the compound. The ion at  $m/z$  688.9 is the  $\text{PF}_6^-$  salt of the  $[\text{Ru}(\text{phen})_2(\text{CH}_3\text{CN})_2]$  compound and the ion at  $m/z$  777.9 is the mono-substituted  $\text{PF}_6^-$  salt of the  $[\text{Ru}(\text{phen})_2(\text{phthz})(\text{CH}_3\text{CN})]$  compound.

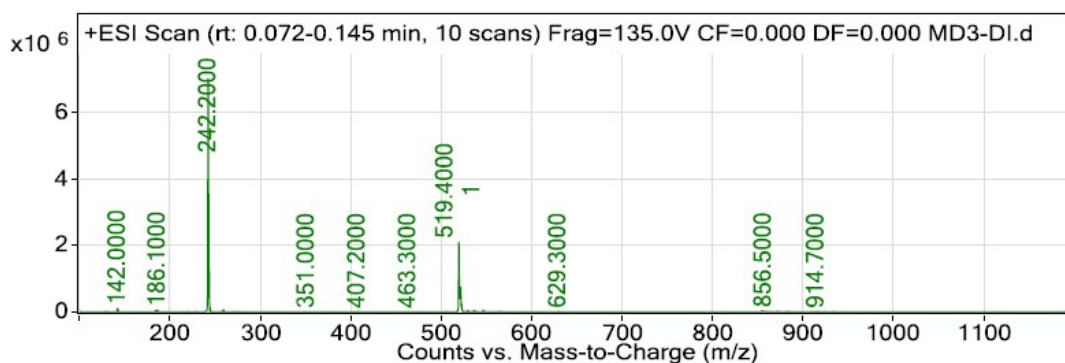

**Fig. S17.** ESI-LC-MS of **1** in  $\text{CH}_2\text{Cl}_2$  with 10 mM  $\text{Bu}_4\text{NCl}$  upon irradiation ( $\lambda_{\text{irr}} = 470 \text{ nm}$ ) for 25 min. The ion at  $m/z$  519.4 is the sodium adduct of the  $[\text{Ru}(\text{phen})_2\text{Cl}]$  compound. The peak at  $m/z$  242.2 is the tetrabutyl ammonium ion.

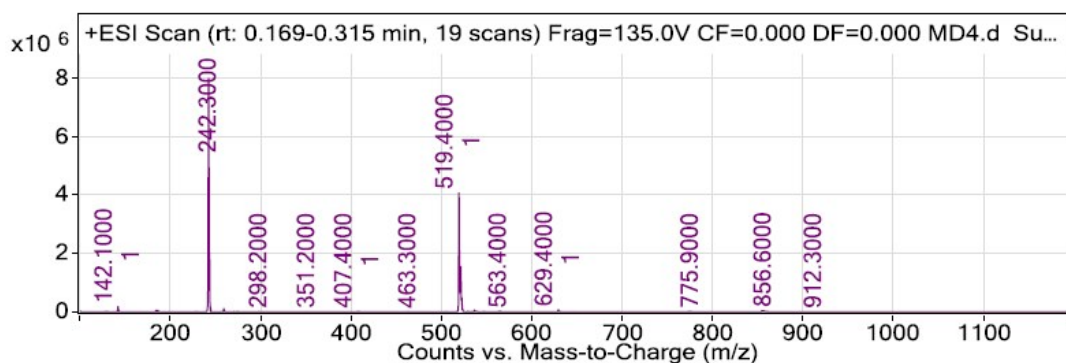

**Fig. S18.** ESI-LC-MS of **2** in  $\text{CH}_2\text{Cl}_2$  with 10 mM  $\text{Bu}_4\text{NCl}$  upon irradiation ( $\lambda_{\text{irr}} = 470 \text{ nm}$ ) for 35 min. The ion at  $m/z$  519.4 is the sodium adduct of the  $[\text{Ru}(\text{phen})_2\text{Cl}]$  compound. The peak at  $m/z$  242.2 is the tetrabutyl ammonium ion.



### 1) Detailed methods for determination of quantum yields

Quantum yields were determined as has been described previously by E. C. Glazer et al. *Chem. Commun.* 54, 2018, 12487-12490. In all cases, the light source was a 470 nm LED array from Elixia. The photon flux of the light source was determined by ferrioxalate actinometry.

#### Part A

##### 1) Procedure for Ferrioxalate Actinometry Method:

The literature procedures reported by C. G. Hatchard et. al. *Proceedings of the Royal Society of London. Series A, Mathematical and Physical Sciences*, 235, No. 1203, 1956, 518-536 and E. C. Glazer et al. *Chem. Commun.* 54, 2018, 12487-12490 has been adapted for the calculation of the photon flux of light source. The reported values for the fraction of light absorbed was 0.85 and the quantum yield at 468 nm was 0.92.

The procedure is as follows-

- 1) Solution A: A solution of potassium ferrioxalate (0.15 M, prepared by dissolving 0.7369 g potassium ferrioxalate in 10 ml 0.05 M sulfuric acid) was used as an actinometer.
- 2) Solution B: A solution of 1% 1,10-phenanthroline was prepared in buffer (1.125 sodium acetate trihydrate, 50 mg 1,10-phenanthroline, 0.14 ml of H<sub>2</sub>SO<sub>4</sub> in water, diluted to 5 ml).
- 3) Solution A (3 ml) was used for irradiation for set times. At each time point, 150 µl aliquots of Solution A, 450 µl of Solution B, and 2400 µl of H<sub>2</sub>O were combined to determine the absorbance of Fe<sup>2+</sup> complex at 510 nm. This complex forms as a result of photolysis of the ferrioxalate.

2) Photon flux of the light source was determined as given below using two approaches.

**Approach 1**

**Table S8.** Photon flux determination of the light source: Experiment 1

| <b>Time<br/>(sec)</b> | <b>Abs.<br/>510 nm</b> | <b>ΔAbs<br/>510 nm</b> | <b>C(Fe<sup>2+</sup>)</b> | <b>Moles</b> | <b>Moles irradiated</b> | <b>Abs.<br/>470 nm</b> | <b>F</b> | <b>Photon<br/>flux</b> |
|-----------------------|------------------------|------------------------|---------------------------|--------------|-------------------------|------------------------|----------|------------------------|
| 0                     | 0.272228               | 0                      | 0                         | 0            | 0                       | 0.4091                 | 0.61     |                        |
| 5                     | 0.331639               | 0.059411               | 0.000005401               | 1.50e-008    | 3.00e-007               |                        |          | 1.068000e-007          |
| 10                    | 0.381460               | 0.109232               | 0.0000099302              | 3.00e-008    | 6.00e-007               |                        |          | 1.069000e-007          |
| 15                    | 0.427324               | 0.155096               | 0.0000140996              | 4.20e-008    | 8.40e-007               |                        |          | 9.900000e-008          |
| 20                    | 0.472480               | 0.200252               | 0.0000182047              | 5.40e-008    | 1.08e-006               |                        |          | 9.600000e-008          |
| 30                    | 0.545232               | 0.273004               | 0.0000248185              | 7.50e-008    | 1.50e-006               |                        |          | 8.900000e-008          |
| 40                    | 0.609845               | 0.337617               | 0.0000306925              | 9.30e-008    | 1.86e-006               |                        |          | 8.288000e-008          |
| 50                    | 0.667881               | 0.395653               | 0.0000359684              | 1.08e-007    | 2.16e-006               |                        |          | 7.697700e-008          |
| 60                    | 0.720422               | 0.448194               | 0.0000407449              | 1.23e-007    | 2.46e-006               |                        |          | 7.305700e-008          |
| 80                    | 0.831456               | 0.559228               | 0.0000508389              | 1.53e-007    | 3.06e-006               |                        |          | 6.815700e-008          |
| 100                   | 0.930189               | 0.657961               | 0.0000598146              | 1.80e-007    | 3.60e-006               |                        |          | 6.414000e-008          |
| 120                   | 1.027413               | 0.755185               | 0.0000686532              | 2.07e-007    | 4.14e-006               |                        |          | 6.147540e-008          |
| 140                   | 1.173820               | 0.901592               | 0.0000819629              | 2.46e-007    | 4.92e-006               |                        |          | 6.262000e-008          |
|                       |                        |                        |                           |              |                         |                        |          | <b>6.462025e-008</b>   |

## Approach 1

**Table S9.** Photon flux determination of the light source: Experiment 2

| <b>Time<br/>(sec)</b> | <b>Abs.<br/>510 nm</b> | <b>ΔAbs<br/>510 nm</b> | <b>C(Fe<sup>2+</sup>)</b> | <b>Moles</b> | <b>Moles<br/>irradiated</b> | <b>Abs.<br/>470 nm</b> | <b>F</b> | <b>Photon<br/>flux</b> |
|-----------------------|------------------------|------------------------|---------------------------|--------------|-----------------------------|------------------------|----------|------------------------|
| 0                     | 0.308288               | 0                      | 0                         | 0            | 0                           | 0.4503                 | 0.64     |                        |
| 5                     | 0.358295               | 0.050007               | 0.0000045461              | 1.50e-008    | 3.00e-007                   |                        |          | 1.019022e-007          |
| 10                    | 0.419489               | 0.111201               | 0.0000101091              | 3.00e-008    | 6.00e-007                   |                        |          | 1.019022e-007          |
| 15                    | 0.474723               | 0.166435               | 0.0000151304              | 4.50e-008    | 9.00e-007                   |                        |          | 1.019022e-007          |
| 20                    | 0.527385               | 0.219097               | 0.0000199179              | 6.00e-008    | 1.20e-006                   |                        |          | 1.019021e-007          |
| 30                    | 0.614912               | 0.306624               | 0.0000278749              | 8.40e-008    | 1.68e-006                   |                        |          | 9.624090e-008          |
| 40                    | 0.666456               | 0.358168               | 0.0000325607              | 9.90e-008    | 1.98e-006                   |                        |          | 8.491000e-008          |
| 50                    | 0.726587               | 0.418299               | 0.0000380272              | 1.14e-007    | 2.28e-006                   |                        |          | 7.812500e-008          |
| 60                    | 0.810924               | 0.502636               | 0.0000456942              | 1.38e-007    | 2.76e-006                   |                        |          | 7.925000e-008          |
| 80                    | 0.953578               | 0.645290               | 0.0000586627              | 1.77e-007    | 3.54e-006                   |                        |          | 7.430000e-008          |
| 100                   | 1.008894               | 0.700606               | 0.000066369               | 1.98e-007    | 3.96e-006                   |                        |          | 6.793000e-008          |
| 120                   | 1.136546               | 0.828258               | 0.00007529                | 2.25e-007    | 4.50e-006                   |                        |          | 6.368000e-008          |
|                       |                        |                        |                           |              |                             |                        |          | <b>4.984300e-008</b>   |

3) **Approach 2:** The change in absorbance of Fe<sup>2+</sup> at 510 nm was plotted against irradiation time.

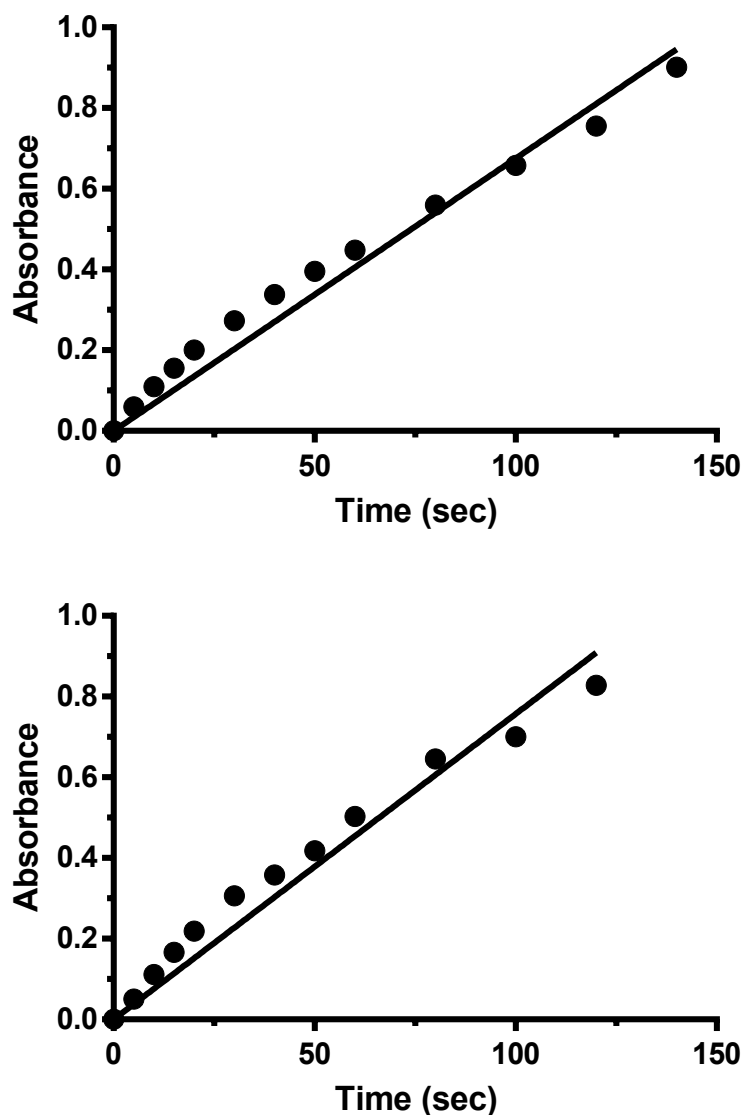

**Fig. S19.** Linear regression plot of absorbance vs. time for [Fe(phen)<sub>3</sub>]<sup>2+</sup> complex formation.

The slope corresponds to the  $dA/dt$  value and the equation for the photon flux is as follows-

$$q = \frac{dA}{dt} \times \frac{V1}{\epsilon \times l} \times \frac{V3}{V2 \times \phi \times F}$$

Where  $q$  is photon flux (Einstein/s),  $dA/dt$  is slope,  $V1$ -volume of irradiated actinometer (0.15 M, 3000  $\mu$ L),  $V2$  is the aliquot of actinometer taken to determine the concentration of [Fe(phen)<sub>3</sub>]<sup>2+</sup> (150  $\mu$ L),  $V3$  is the volume of the solution measured after complexation (3000  $\mu$ L),  $\epsilon$  is the extinction coefficient of [Fe(phen)<sub>3</sub>]<sup>2+</sup> (11000) as previously reported by Oktavia, B.; Lim, L. W.; Takeuchi, T., *Anal. Sci.* **2008**, 24 (11), 1487-1492,  $l$  is the path

length,  $\phi$  is the quantum yield of actinometer at 468 nm (0.92) determined by C. G. Hatchard *et. al. Proceedings of the Royal Society of London. Series A, Mathematical and Physical Sciences*, 235 (1203), **1956**, 518-536 and  $F=1-1/10^{A_{(470)}}$  is the photon absorption probability for the actinometer. For all subsequent quantum yield determinations, we used  $q = 6.785E-08$  (average of values obtained by Approach 2).

## Part B

### Quantum Yield Determination for 1-2

1) For compounds **1–2** in CH<sub>2</sub>Cl<sub>2</sub> in the presence of 10 mM Bu<sub>4</sub>NCl, the change in absorbance upon irradiation possessed clear isosbestic points for both steps (Fig. 3 and 4) of photosubstitution. As a result, the moles of decreasing reactant were determined based on the changes in normalized corrected  $\Delta$  Absorbance (reactant vs. product) over time, which is used in the  $t_{1/2}$  determinations. To calculate the photosubstitution quantum yield for Step 1, the average absorbance for the first five time points at 470 nm was measured and used for the calculation of the photon absorption probability (F) for each compound. Similarly for the second step of the photochemical reaction, the average absorbance at 470 nm was measured for the first five time points and was used for calculation of the photon absorption probability (F) of the intermediate photosubstitution (Step 2) for compounds **1–2**.

**Table S10.** Photon absorption probability (F) for **1-2**.

| Compound  | <b>1</b> |        | <b>2</b> |        |
|-----------|----------|--------|----------|--------|
|           | 1        | 2      | 1        | 2      |
| Step      |          |        |          |        |
| Abs 470nm | 0.4164   | 0.3925 | 0.5738   | 0.5528 |
| F         | 0.616    | 0.594  | 0.733    | 0.719  |

2) The corrected change in absorbance ( $\Delta A_{corr}$ ) was calculated for each time point for **1**, **step 1** as:

$$\Delta A_{corr} = A_t^{542} - A_t^{420} - (A_0^{542} - A_0^{420})$$

Where  $A_t^{542}$  is the MLCT absorbance of photoproduct/intermediate (Step 1) at each time point (t) increasing over time,  $A_t^{420}$  is MLCT absorbance of **1** at each time point (t) decreasing over time,  $A_0^{542}$  is the initial MLCT absorbance of photoproduct/intermediate (Step 1), and  $A_0^{420}$  is initial MLCT absorbance for **1**.

The normalized corrected change in absorbance has been calculated for each time point as:

$$\text{Normalized } \Delta A_{\text{corr}} = 1 - \Delta A_{\text{corr}} / \Delta A_{\text{corr}}^{\text{max}}$$

Where  $\Delta A_{\text{corr}}^{\text{max}}$  is maximum corrected change in absorbance.

We calculated the moles of the starting compound and product at each time point.

The initial moles (*mol*) has been calculated as-

$$\text{mol} = A_0^{420} * V / (\epsilon * l)$$

Where  $A_0^{420}$  is initial MLCT absorbance for **1**, step 1,  $V$  is the aliquot irradiated (3000  $\mu\text{L}$ ),  $\epsilon$  is the extinction coefficient for **1** and  $l$  is the path length. Similarly we calculated the moles at each time points for **1** and **2** for Step 1 and 2. The moles of photon absorbed have been calculated as the product of photons irradiated and photon absorption probability (F).

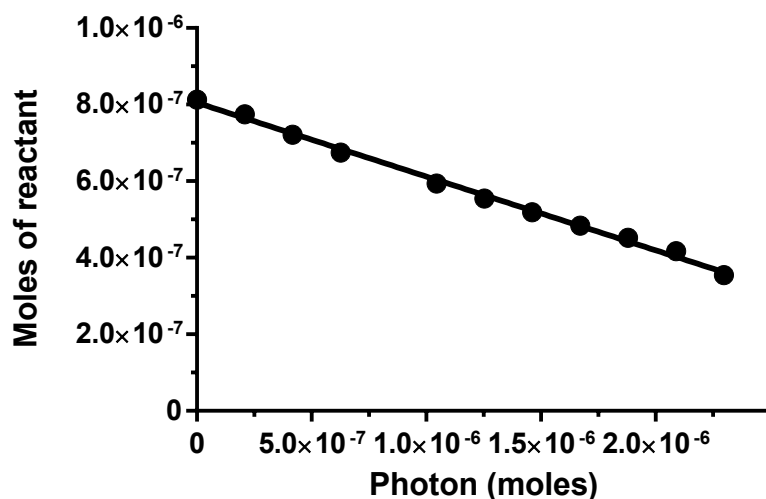

**Fig. S20.** Linear regression plot of moles of reactant vs. moles of photons absorbed for compound **1**, Step 1.

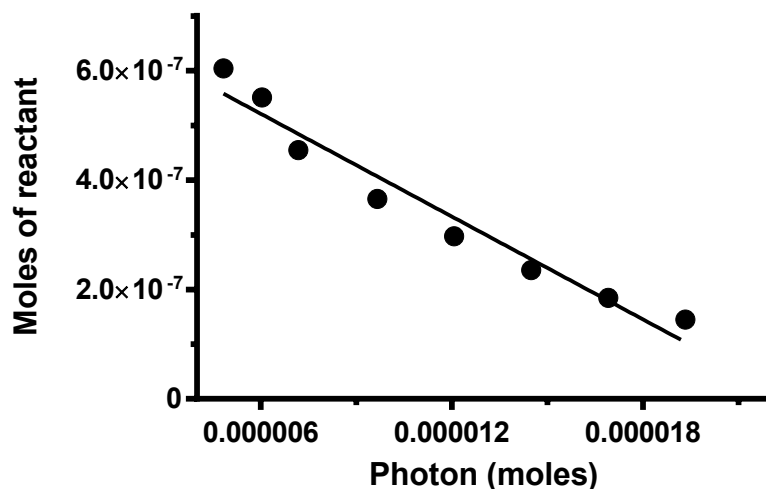

**Fig. S21.** Linear regression plot of moles of reactant vs. moles of photons absorbed for compound 1, Step 2.

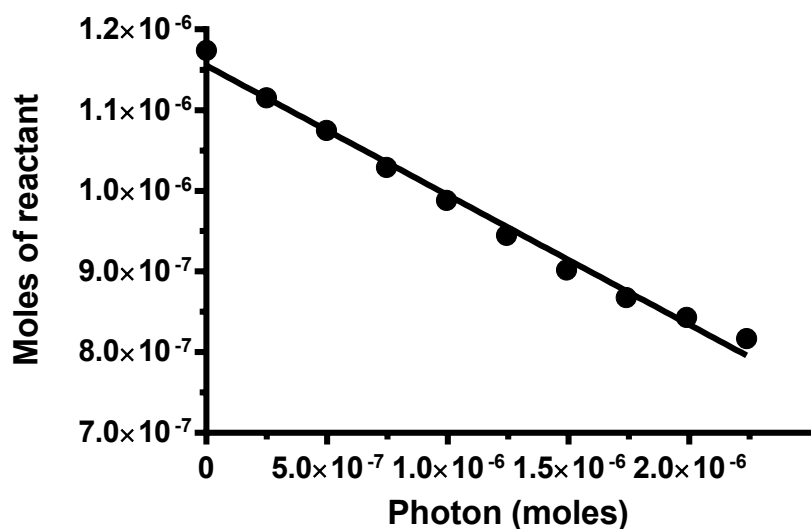

**Fig. S22.** Linear regression plot of moles of reactant vs. moles of photons absorbed for compound 2, Step 1.

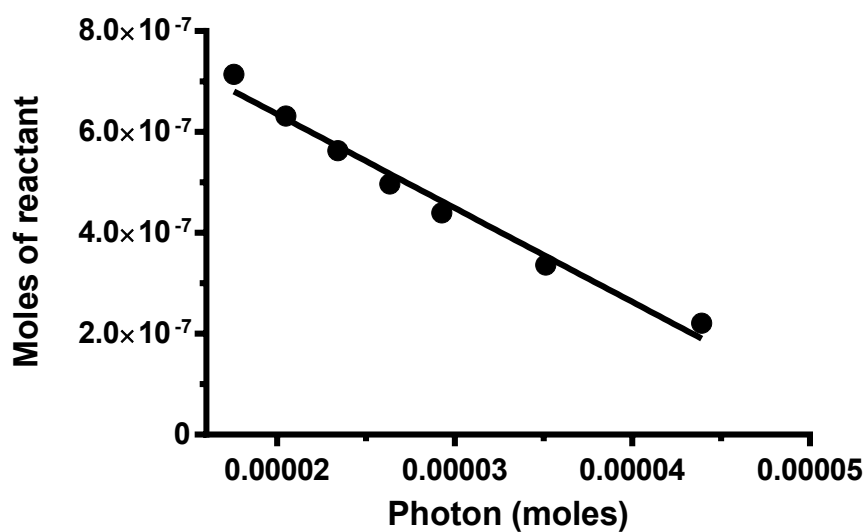

**Fig. S23.** Linear regression plot of moles of reactant vs. moles of photons absorbed for compound 2, Step 2.

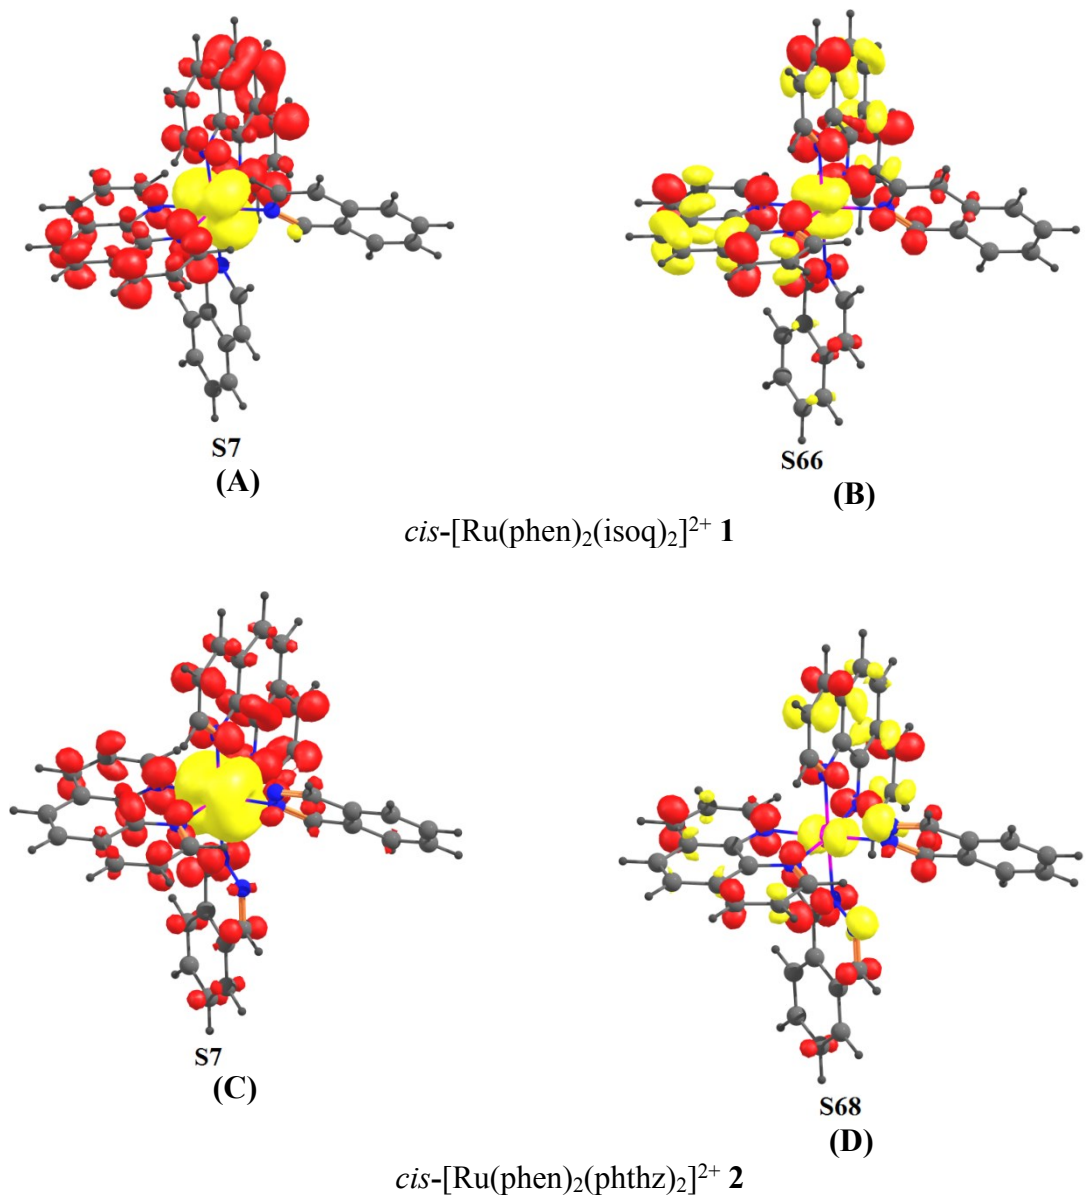

**Fig. S24.** The electron difference density plots (iso-surface value = 0.001247 au) of two low energy singlet-singlet transitions in TD-DFT calculations for **1–2**. The yellow regions indicate the depletion of electron density and red regions indicates the increase in electron density.



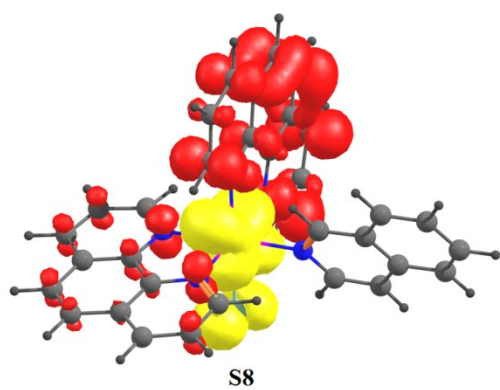

(A)

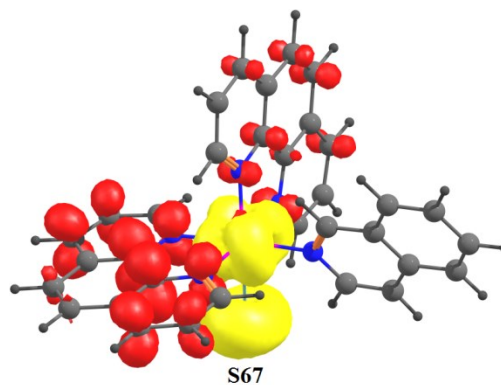

(B)

*cis*-[Ru(phen)<sub>2</sub>(isoq)Cl]<sup>1+</sup> **1a**

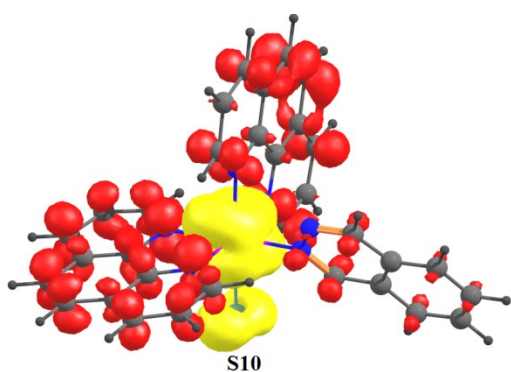

(C)

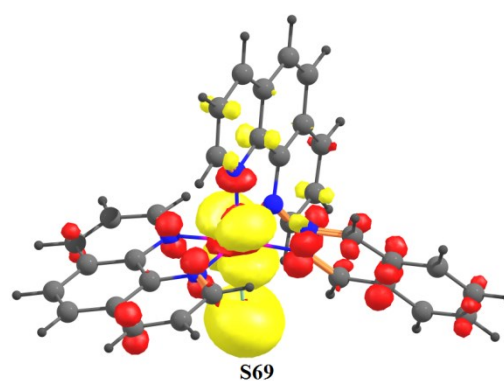

(D)

*cis*-[Ru(phen)<sub>2</sub>(phtz)Cl]<sup>1+</sup> **2a**

**Fig. S25.** The electron difference density plots (iso-surface value = 0.001247 au) of two low energy singlet-singlet transitions in TD-DFT calculations for **1a–2a**. The yellow regions indicate the depletion of electron density and red regions indicates the increase in electron density.

**Table S11.** Calculated bond lengths (Å) and bond angles (°) in the optimized geometry S<sub>0</sub>(DFT), <sup>3</sup>MLCT, <sup>3</sup>MC and <sup>3</sup>TS states of **1a** and **2a** in acetonitrile.

|                   | Ru1-N1 | Ru1-N2 | Ru1-N3 | Ru1-N4 | Ru1-N5 | Ru1-Cl6 | N1-Ru1-N3 | N2-Ru1-N3 | N4-Ru1-N3 | N1-Ru1-N5 | N2-Ru1-N5 | N4-Ru1-N5 | N3-Ru1-Cl6 |
|-------------------|--------|--------|--------|--------|--------|---------|-----------|-----------|-----------|-----------|-----------|-----------|------------|
| <b>1a</b>         |        |        |        |        |        |         |           |           |           |           |           |           |            |
| S <sub>0</sub>    | 2.063  | 2.043  | 2.056  | 2.064  | 2.117  | 2.441   | 96        | 91        | 80        | 87        | 91        | 96        | 175        |
| <sup>3</sup> MLCT | 2.080  | 2.027  | 2.068  | 2.077  | 2.117  | 2.392   | 98        | 87        | 80        | 85        | 90        | 97        | 176        |
| <sup>3</sup> MC   | 2.064  | 2.103  | 2.383  | 2.109  | 2.545  | 2.408   | 106       | 87        | 74        | 87        | 88        | 92        | 164        |
| <sup>3</sup> TS   | 2.062  | 2.159  | 2.229  | 2.084  | 2.384  | 2.429   | 102       | 86        | 77        | 87        | 88        | 94        | 167        |
| <b>2a</b>         |        |        |        |        |        |         |           |           |           |           |           |           |            |
| S <sub>0</sub>    | 2.062  | 2.043  | 2.062  | 2.065  | 2.069  | 2.444   | 96        | 94        | 80        | 89        | 90        | 96        | 176        |
| <sup>3</sup> MLCT | 2.077  | 2.040  | 2.071  | 2.088  | 2.069  | 2.382   | 96        | 89        | 79        | 86        | 91        | 98        | 178        |
| <sup>3</sup> MC   | 2.065  | 2.099  | 2.378  | 2.104  | 2.472  | 2.421   | 105       | 90        | 74        | 87        | 88        | 93        | 167        |
| <sup>3</sup> TS   | 2.070  | 2.161  | 2.337  | 2.073  | 2.245  | 2.514   | 102       | 87        | 76        | 87        | 103       | 96        | 168        |

**Table S12.** Selected TD-DFT singlet-singlet transitions along with oscillator strength (*f*) and orbital contribution in **1a** and **2a**.<sup>a</sup>

| Transition | Energy (eV) | Wavelength (nm) | Oscillator Strength ( <i>f</i> ) | Major Contributions                                                             | Orbital transitions                                                                                                                                                                              |
|------------|-------------|-----------------|----------------------------------|---------------------------------------------------------------------------------|--------------------------------------------------------------------------------------------------------------------------------------------------------------------------------------------------|
| <b>1a</b>  |             |                 |                                  |                                                                                 |                                                                                                                                                                                                  |
| S7         | 2.78        | 446             | 0.0916                           | H-2 → LUMO (29%),<br>H-1 → L+2 (23%),<br>HOMO → LUMO (10%),<br>HOMO → L+3 (23%) | $d_{xy} \rightarrow \pi^*(\text{Phen})$<br>$d_z^2 \rightarrow \pi^*(\text{Phen})$<br>$d_{xz} \rightarrow \pi^*(\text{Phen})$<br>$d_{xz} \rightarrow \pi^*(\text{Phen})$                          |
| S8         | 2.86        | 433             | 0.1115                           | H-1 → L+1 (14%),<br>H-1 → L+2 (61%)                                             | $d_z^2 \rightarrow \pi^*(\text{Phen})$<br>$d_z^2 \rightarrow \pi^*(\text{Phen})$                                                                                                                 |
| S13        | 3.11        | 398             | 0.0908                           | H-2 → L+2 (33%),<br>H-2 → L+4 (18%),<br>H-1 → L+1 (12%)                         | $d_{xy} \rightarrow \pi^*(\text{Phen})$<br>$d_{xy} \rightarrow \pi^*(\text{Isoq})$<br>$d_z^2 \rightarrow \pi^*(\text{Phen})$                                                                     |
| S59        | 4.99        | 248             | 0.0997                           | H-1 → L+9 (39%)                                                                 | $d_z^2 \rightarrow \pi^*(\text{Phen})$                                                                                                                                                           |
| S62        | 5.04        | 245             | 0.295                            | H-8 → L+1 (17%),<br>H-2 → L+8 (11%)                                             | $p(\text{Cl}) \rightarrow \pi^*(\text{Phen})$<br>$d_{xy} \rightarrow \pi^*(\text{Phen})$                                                                                                         |
| S65        | 5.08        | 243             | 0.2021                           | HOMO → L+10 (38%),<br>HOMO → L+11 (10%)                                         | $d_{xz} \rightarrow d_z^{2*}$<br>$d_{xz} \rightarrow d_z^{2*}$                                                                                                                                   |
| S66        | 5.10        | 243             | 0.1018                           | H-2 → L+9 (35%),<br>HOMO → L+10 (18%)                                           | $d_{xy} \rightarrow \pi^*(\text{Phen})$<br>$d_{xz} \rightarrow d_z^{2*}$                                                                                                                         |
| S67        | 5.11        | 242             | 0.3471                           | H-2 → L+9 (31%)                                                                 | $d_{xy} \rightarrow \pi^*(\text{Phen})$                                                                                                                                                          |
| S68        | 5.12        | 242             | 0.1108                           | H-9 → L+2 (39%)<br>H-8 → L+2 (11%)<br>H-8 → L+3 (10%)<br>H-7 → L+3 (15%)        | $p(\text{Cl}) \rightarrow \pi^*(\text{Phen})$<br>$p(\text{Cl}) \rightarrow \pi^*(\text{Phen})$<br>$p(\text{Cl}) \rightarrow \pi^*(\text{Phen})$<br>$p(\text{Cl}) \rightarrow \pi^*(\text{Phen})$ |
| <b>2a</b>  |             |                 |                                  |                                                                                 |                                                                                                                                                                                                  |
| S10        | 2.89        | 429             | 0.168                            | H-1 → L+1 (19%),<br>H-1 → L+2 (34%),<br>HOMO → L+3 (19%)                        | $d_{yz} \rightarrow \pi^*(\text{Phen})$<br>$d_{yz} \rightarrow \pi^*(\text{Phen})$<br>$d_{xz} \rightarrow \pi^*(\text{Phen})$                                                                    |
| S11        | 2.96        | 418             | 0.1006                           | H-1 → L+2 (15%),<br>H-1 → L+3 (26%),<br>H-1 → L+4 (30%)                         | $d_{yz} \rightarrow \pi^*(\text{Phen})$<br>$d_{yz} \rightarrow \pi^*(\text{Phen})$<br>$d_{yz} \rightarrow \pi^*(\text{Phthz})$                                                                   |
| S12        | 2.99        | 415             | 0.1157                           | H-2 → L+2 (30%),<br>H-1 → L+3 (45%)                                             | $d_{xy} \rightarrow \pi^*(\text{Phen})$<br>$d_{yz} \rightarrow \pi^*(\text{Phen})$                                                                                                               |
| S19        | 3.56        | 348             | 0.119                            | H-2 → L+5 (56%),<br>HOMO → L+5 (10%)                                            | $d_{xy} \rightarrow \pi^*(\text{Phen})$<br>$d_{xz} \rightarrow \pi^*(\text{Phthz})$                                                                                                              |
| S55        | 4.94        | 251             | 0.0956                           | H-7 → L+1 (16%),<br>H-6 → L+1 (18%)                                             | $\pi(\text{Phen}) \rightarrow \pi^*(\text{Phen})$<br>$\pi(\text{Phen}) \rightarrow \pi^*(\text{Phen})$                                                                                           |
| S56        | 4.95        | 250             | 0.1096                           | H-7 → LUMO (16%),<br>HOMO → L+9 (12%)                                           | $\pi(\text{Phen}) \rightarrow \pi^*(\text{Phen})$<br>$d_{xz} \rightarrow \pi^*(\text{Phen})$                                                                                                     |
| S64        | 5.04        | 245             | 0.1325                           | H-9 → L+2 (10%)                                                                 | $p(\text{Cl}) \rightarrow \pi^*(\text{Phen})$                                                                                                                                                    |
| S69        | 5.12        | 242             | 0.2350                           | HOMO → L+10 (32%)                                                               | $d_{xz} \rightarrow d_z^{2*}$                                                                                                                                                                    |
| S76        | 5.17        | 239             | 0.1054                           | H-8 → L+2 (10%),<br>H-8 → L+3 (13%),<br>H-8 → L+4 (25%)                         | $p(\text{Cl}) \rightarrow \pi^*(\text{Phen})$<br>$p(\text{Cl}) \rightarrow \pi^*(\text{Phen})$<br>$p(\text{Cl}) \rightarrow \pi^*(\text{Phthz})$                                                 |

<sup>a</sup> **Abbreviations:** Phen= phenanthroline, Phthz= phthalazine, Isoq= isoquinoline

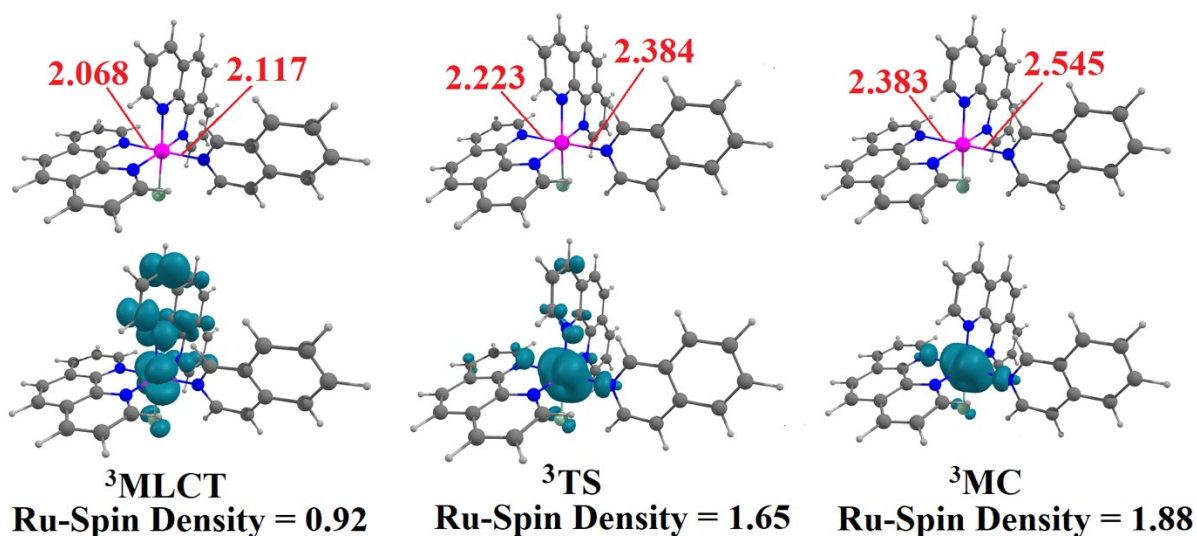

**Fig. S26.** Optimized structures and spin density plots (iso-surface value = 0.004 au) of the triplet states for the *cis*-[Ru(phen)<sub>2</sub>(isoq)Cl]<sup>1+</sup> **1a** in acetonitrile. The respective Ru–N distances are shown in red color.

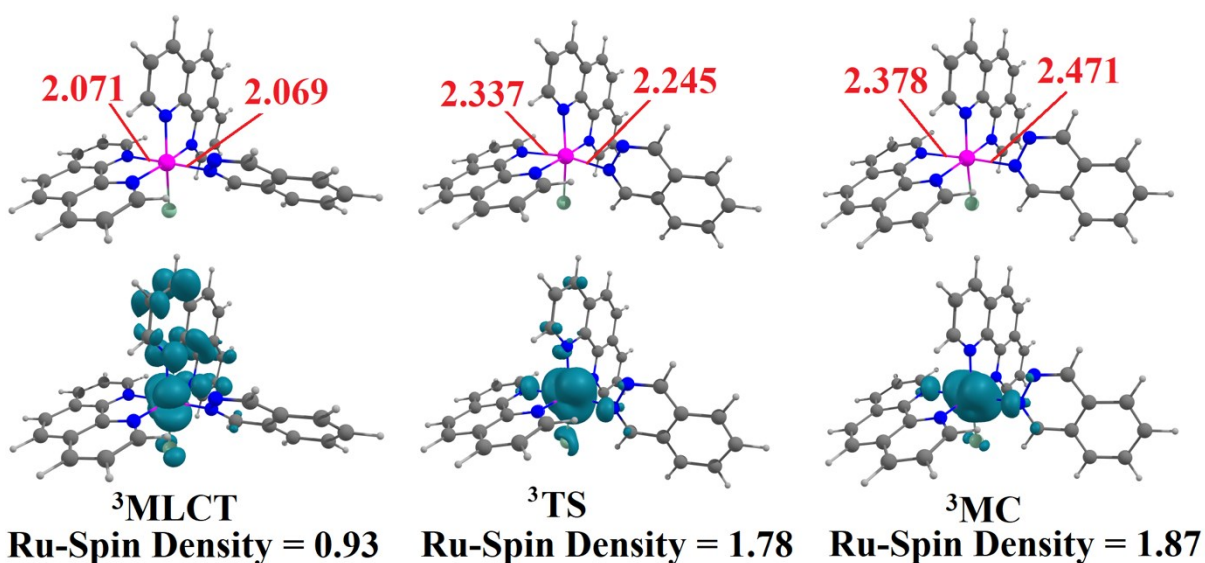

**Fig. S27.** Optimized structures and spin density plots (iso-surface value = 0.004 au) of the triplet states for the *cis*-[Ru(phen)<sub>2</sub>(phthz)Cl]<sup>1+</sup> **2a** in acetonitrile. The respective Ru–N distances are shown in red color.

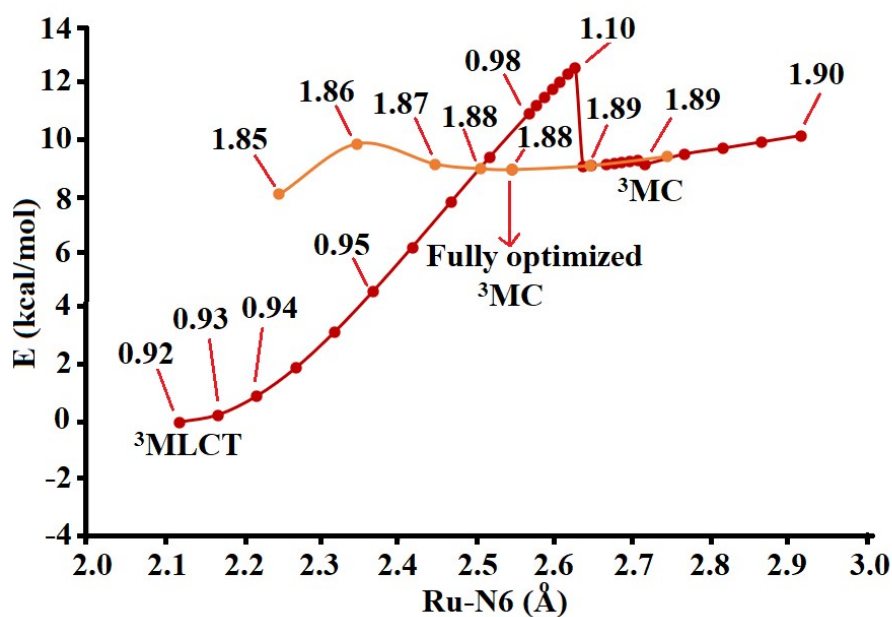

(A)

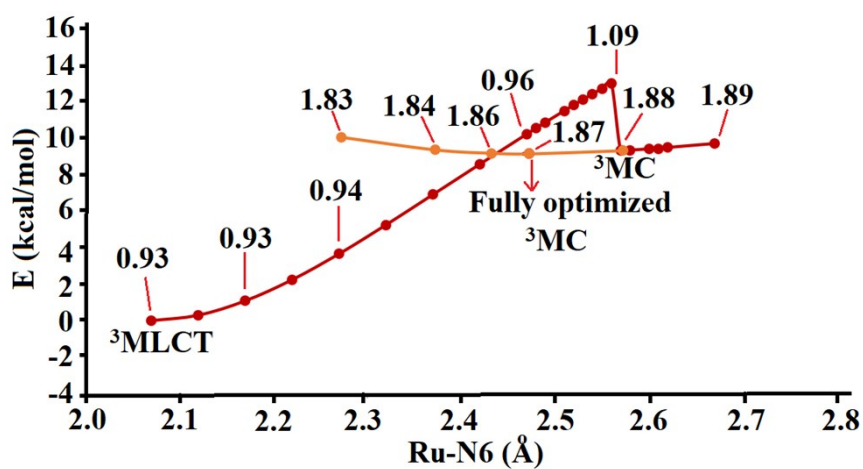

(B)

**Fig. S28.** Relaxed potential energy scans from the  $^3\text{MLCT}$  towards  $^3\text{MC}$  (red line) and from  $^3\text{MC}$  towards  $^3\text{MLCT}$  (orange line) states of A) *cis*- $[\text{Ru}(\text{phen})_2(\text{isoq})\text{Cl}]^{1+}$  **1a** in acetonitrile for stretching the Ru–N5(isoq)Cl coordinate and B) *cis*- $[\text{Ru}(\text{phen})_2(\text{phthz})\text{Cl}]^{1+}$  **2a** in acetonitrile for stretching the Ru–N5(phthz)Cl coordinate. The numbers along the PES lines corresponds to the spin density values on the Ru-centre.

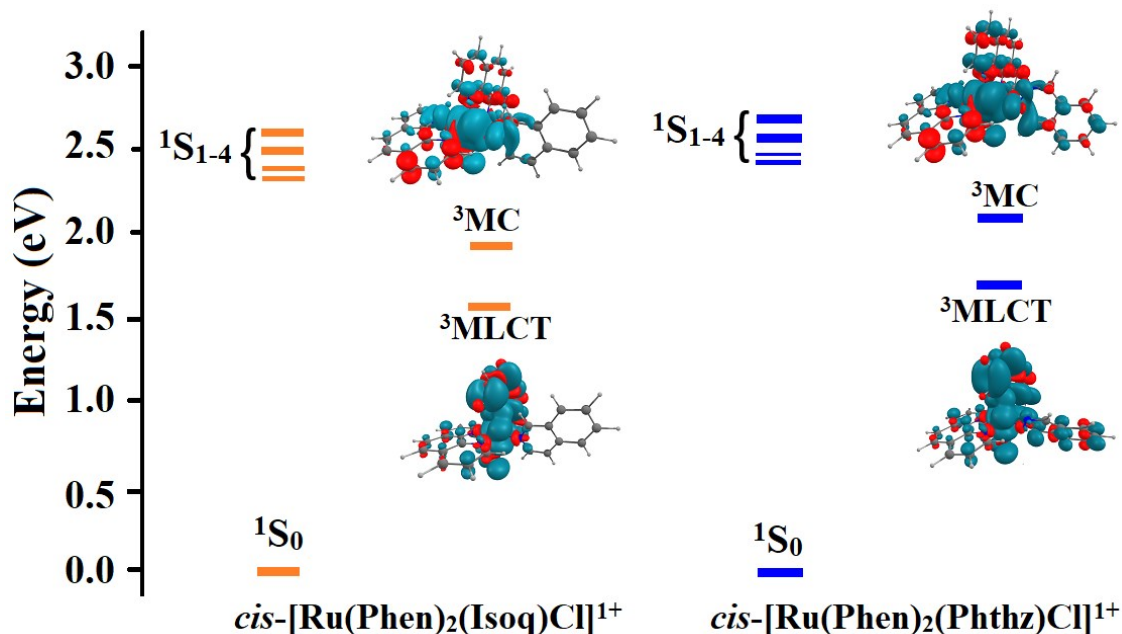

**Fig. S29.** Jablonski diagram obtained using DFT (triplets) and TD-DFT (singlets) data for *cis*-[Ru(phen)<sub>2</sub>(isoq)Cl]<sup>1+</sup> **1a** and *cis*-[Ru(phen)<sub>2</sub>(phthz)Cl]<sup>1+</sup> **2a**. Spin densities are plotted for <sup>3</sup>MLCT and <sup>3</sup>MC states (iso-surface value = 0.004 au).

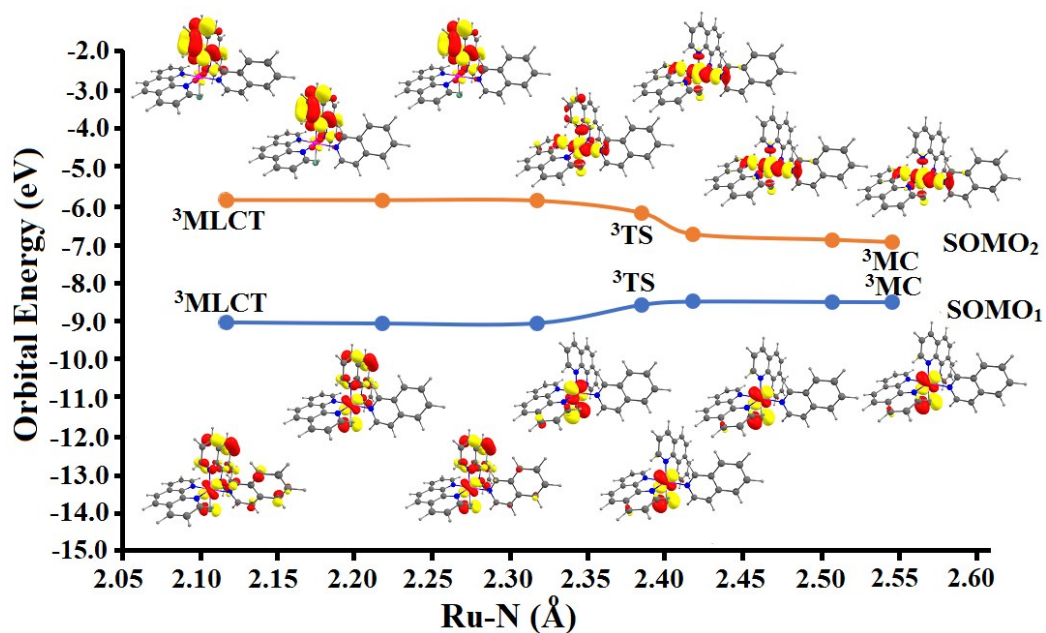

**Fig. S30.** MO diagram for the relaxed PES scan of the triplet state of **1a** in acetonitrile along the Ru–N5(isoq)Cl coordinate. Selected isosurface plots (iso-surface value = 0.04 au) of SOMOs are present to show the changes in electron population and geometry.

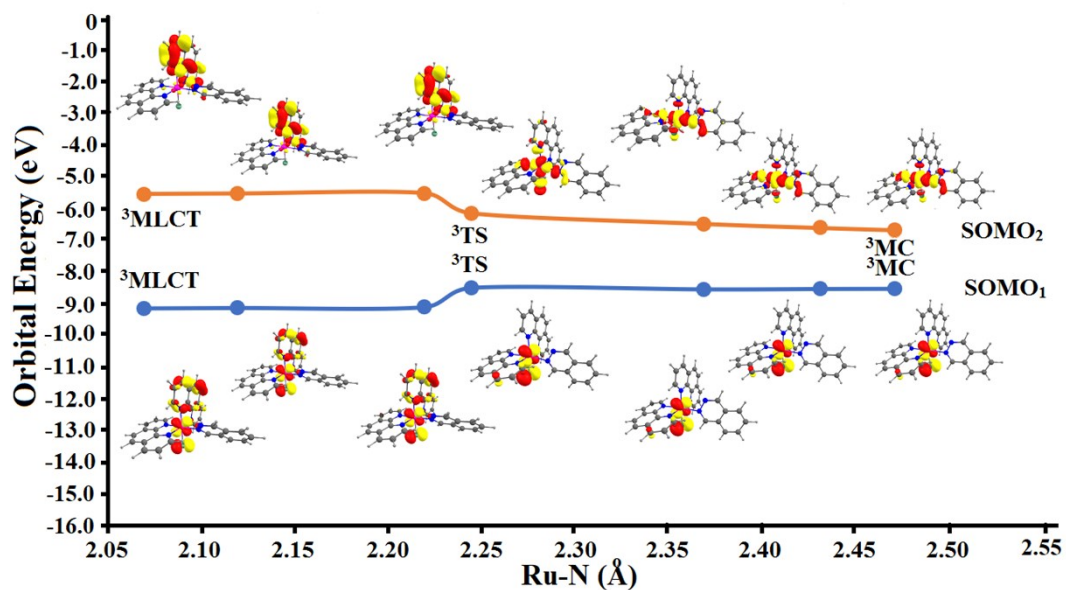

**Fig. S31.** MO diagram for the relaxed PES scan of the triplet state of **2a** in acetonitrile along the Ru–N5(phthz)Cl coordinate. Selected isosurface plots (iso-surface value = 0.04 au) of SOMOs are present to show the changes in electron population and geometry.

**Cartesian coordinates:***cis*-[Ru(phen)<sub>2</sub>(Isoq)<sub>2</sub>]<sup>2+</sup>: <sup>1</sup>S<sub>0</sub>

E(RPBE1PBE) = -2038.98628016 A.U.

|    |              |              |              |   |              |              |              |
|----|--------------|--------------|--------------|---|--------------|--------------|--------------|
| Ru | -0.013002000 | -0.390045000 | -0.101135000 | H | 3.243387000  | -0.809903000 | 4.883005000  |
| N  | -1.075703000 | -0.565970000 | -1.886643000 | C | 1.819602000  | 0.411199000  | 3.828342000  |
| C  | -0.765216000 | -0.088408000 | -3.102669000 | H | 1.785863000  | 1.193364000  | 4.576793000  |
| H  | 0.181274000  | 0.428074000  | -3.195380000 | C | 1.027641000  | 0.532167000  | 2.675654000  |
| N  | -1.656508000 | -1.469795000 | 0.545304000  | H | 0.386170000  | 1.391286000  | 2.529034000  |
| C  | -1.611861000 | -0.246319000 | -4.210995000 | C | 3.444465000  | -2.886136000 | 3.069060000  |
| H  | -1.308825000 | 0.159744000  | -5.168251000 | H | 4.073043000  | -3.035414000 | 3.940099000  |
| N  | 1.009731000  | -2.183777000 | -0.261946000 | C | 3.412449000  | -3.818339000 | 2.072278000  |
| C  | -2.815421000 | -0.914492000 | -4.071294000 | H | 4.013753000  | -4.718104000 | 2.142818000  |
| H  | -3.479713000 | -1.047342000 | -4.918128000 | C | -1.875750000 | 1.575726000  | 1.268541000  |
| N  | 1.017753000  | -0.398950000 | 1.708597000  | H | -1.900566000 | 0.769460000  | 1.992729000  |
| C  | -3.174285000 | -1.428056000 | -2.805700000 | C | -1.790830000 | 3.554013000  | -0.634797000 |
| N  | -1.082406000 | 1.406081000  | 0.204812000  | H | -1.731449000 | 4.308649000  | -1.411347000 |
| C  | -2.272917000 | -1.222191000 | -1.738301000 | C | -2.631295000 | 3.760892000  | 0.488526000  |
| C  | -1.051668000 | 2.404607000  | -0.747541000 | C | -2.670892000 | 2.724140000  | 1.473469000  |
| C  | -2.575990000 | -1.718280000 | -0.440567000 | C | -3.497355000 | 2.873816000  | 2.617702000  |
| N  | 1.651463000  | 0.649693000  | -0.885793000 | H | -3.528527000 | 2.084401000  | 3.362453000  |
| C  | -3.766775000 | -2.441993000 | -0.212176000 | C | -4.252387000 | 4.014130000  | 2.773051000  |
| C  | 2.397040000  | 0.092728000  | -1.906277000 | H | -4.885444000 | 4.133567000  | 3.644835000  |
| C  | -3.989687000 | -2.935672000 | 1.091800000  | C | -4.212491000 | 5.041989000  | 1.797380000  |
| H  | -4.890492000 | -3.498392000 | 1.310726000  | H | -4.816174000 | 5.931189000  | 1.940111000  |
| C  | -3.045304000 | -2.698112000 | 2.075426000  | C | -3.419891000 | 4.921652000  | 0.675860000  |
| H  | -3.184480000 | -3.073136000 | 3.081892000  | H | -3.392957000 | 5.709360000  | -0.069525000 |
| C  | -1.890178000 | -1.961113000 | 1.772404000  | C | 2.062836000  | 1.812206000  | -0.369790000 |
| H  | -1.138189000 | -1.761232000 | 2.524983000  | H | 1.466310000  | 2.228947000  | 0.432435000  |
| C  | -4.672088000 | -2.637460000 | -1.308265000 | C | 3.522921000  | 0.691016000  | -2.409554000 |
| H  | -5.590370000 | -3.186307000 | -1.130441000 | H | 4.073875000  | 0.211054000  | -3.210960000 |
| C  | -4.389773000 | -2.147267000 | -2.550696000 | C | 3.973523000  | 1.929762000  | -1.884782000 |
| H  | -5.081937000 | -2.300251000 | -3.371429000 | C | 3.207897000  | 2.504441000  | -0.822197000 |
| C  | 0.937920000  | -3.091090000 | -1.248938000 | C | 3.610881000  | 3.742147000  | -0.257279000 |
| H  | 0.284606000  | -2.855407000 | -2.079178000 | H | 3.027588000  | 4.177688000  | 0.548123000  |
| C  | 1.670548000  | -4.287544000 | -1.220021000 | C | 4.734082000  | 4.379860000  | -0.733942000 |
| H  | 1.576783000  | -4.984432000 | -2.043731000 | H | 5.045835000  | 5.325788000  | -0.306063000 |
| C  | 2.502795000  | -4.561594000 | -0.148743000 | C | 5.493475000  | 3.809364000  | -1.785853000 |
| H  | 3.081330000  | -5.478181000 | -0.114706000 | H | 6.374809000  | 4.328658000  | -2.145088000 |
| C  | 2.589382000  | -3.633391000 | 0.911584000  | C | 5.123979000  | 2.608131000  | -2.353108000 |
| C  | 1.813393000  | -2.457581000 | 0.814165000  | H | 5.707153000  | 2.174173000  | -3.158344000 |
| C  | 1.831267000  | -1.495451000 | 1.860746000  | H | 2.046559000  | -0.858522000 | -2.280443000 |
| C  | 2.648638000  | -1.694090000 | 2.995068000  | H | -0.403875000 | 2.227984000  | -1.593362000 |
| C  | 2.628395000  | -0.698702000 | 3.996754000  |   |              |              |              |



*cis*-[Ru(phen)<sub>2</sub>(Isoq)<sub>2</sub>]<sup>2+</sup>: <sup>3</sup>MLCT

E(UPBE1PBE) = -2038.90712035 A.U.

|    |              |              |              |   |              |              |              |
|----|--------------|--------------|--------------|---|--------------|--------------|--------------|
| Ru | -0.011399000 | -0.330094000 | -0.108419000 | H | 3.136454000  | -0.828909000 | 4.938001000  |
| N  | -1.046313000 | -0.486814000 | -1.920521000 | C | 1.764615000  | 0.442152000  | 3.862166000  |
| C  | -0.738656000 | 0.013177000  | -3.128925000 | H | 1.742426000  | 1.221699000  | 4.613063000  |
| H  | 0.200480000  | 0.545667000  | -3.213576000 | C | 0.999118000  | 0.587495000  | 2.701209000  |
| N  | -1.621459000 | -1.431984000 | 0.509835000  | H | 0.385687000  | 1.466771000  | 2.547155000  |
| C  | -1.576009000 | -0.141835000 | -4.239143000 | C | 3.292778000  | -2.917828000 | 3.134724000  |
| H  | -1.277705000 | 0.280543000  | -5.190259000 | H | 3.906428000  | -3.089662000 | 4.012316000  |
| N  | 0.918619000  | -2.146019000 | -0.238272000 | C | 3.228469000  | -3.855300000 | 2.143728000  |
| C  | -2.775064000 | -0.837097000 | -4.109494000 | H | 3.789436000  | -4.779623000 | 2.228315000  |
| H  | -3.431057000 | -0.969113000 | -4.963047000 | C | -1.919615000 | 1.599493000  | 1.252709000  |
| N  | 0.978787000  | -0.342661000 | 1.730926000  | H | -1.963365000 | 0.774691000  | 1.954642000  |
| C  | -3.131916000 | -1.374874000 | -2.861691000 | C | -1.772313000 | 3.628720000  | -0.599480000 |
| N  | -1.096584000 | 1.465308000  | 0.206270000  | H | -1.688626000 | 4.404383000  | -1.352463000 |
| C  | -2.238235000 | -1.171627000 | -1.776109000 | C | -2.650495000 | 3.802930000  | 0.500719000  |
| C  | -1.031445000 | 2.482241000  | -0.723347000 | C | -2.723502000 | 2.739659000  | 1.456902000  |
| C  | -2.530049000 | -1.688699000 | -0.499129000 | C | -3.590647000 | 2.855704000  | 2.574770000  |
| N  | 1.711244000  | 0.632936000  | -0.880083000 | H | -3.646651000 | 2.046172000  | 3.295740000  |
| C  | -3.699562000 | -2.454990000 | -0.279248000 | C | -4.353726000 | 3.990230000  | 2.732475000  |
| C  | 2.412018000  | 0.046455000  | -1.915368000 | H | -5.018789000 | 4.085175000  | 3.583042000  |
| C  | -3.904610000 | -2.984093000 | 1.008347000  | C | -4.280490000 | 5.043861000  | 1.786611000  |
| H  | -4.787174000 | -3.578044000 | 1.216315000  | H | -4.891513000 | 5.927744000  | 1.931121000  |
| C  | -2.952002000 | -2.749766000 | 2.009483000  | C | -3.447387000 | 4.956499000  | 0.691035000  |
| H  | -3.084225000 | -3.162381000 | 3.001891000  | H | -3.396671000 | 5.764437000  | -0.030889000 |
| C  | -1.828756000 | -1.981802000 | 1.737348000  | C | 2.181043000  | 1.764289000  | -0.343927000 |
| H  | -1.074543000 | -1.786791000 | 2.488465000  | H | 1.616375000  | 2.194975000  | 0.474102000  |
| C  | -4.596139000 | -2.649556000 | -1.385506000 | C | 3.564545000  | 0.593800000  | -2.414381000 |
| H  | -5.498886000 | -3.227597000 | -1.220920000 | H | 4.086767000  | 0.095610000  | -3.223540000 |
| C  | -4.328397000 | -2.126879000 | -2.618839000 | C | 4.079899000  | 1.801061000  | -1.876403000 |
| H  | -5.017333000 | -2.283454000 | -3.441680000 | C | 3.353422000  | 2.402751000  | -0.799639000 |
| C  | 0.788785000  | -3.081281000 | -1.218866000 | C | 3.825594000  | 3.609734000  | -0.220840000 |
| H  | 0.137796000  | -2.830238000 | -2.046149000 | H | 3.273695000  | 4.064349000  | 0.595864000  |
| C  | 1.462987000  | -4.291928000 | -1.162862000 | C | 4.978161000  | 4.191750000  | -0.698209000 |
| H  | 1.341189000  | -5.004129000 | -1.969334000 | H | 5.344430000  | 5.112967000  | -0.259976000 |
| C  | 2.296283000  | -4.584982000 | -0.073370000 | C | 5.697531000  | 3.595426000  | -1.764133000 |
| H  | 2.830746000  | -5.526886000 | -0.027302000 | H | 6.602979000  | 4.071501000  | -2.123223000 |
| C  | 2.423023000  | -3.651866000 | 0.970539000  | C | 5.260748000  | 2.423127000  | -2.344827000 |
| C  | 1.704440000  | -2.436494000 | 0.861545000  | H | 5.814929000  | 1.969645000  | -3.159512000 |
| C  | 1.751368000  | -1.478872000 | 1.891594000  | H | 2.012297000  | -0.882126000 | -2.297002000 |
| C  | 2.547618000  | -1.695071000 | 3.048947000  | H | -0.362573000 | 2.324796000  | -1.556771000 |
| C  | 2.541324000  | -0.701278000 | 4.040374000  |   |              |              |              |

*cis*-[Ru(phen)<sub>2</sub>(Isoq)<sub>2</sub>]<sup>2+</sup>: <sup>3</sup>MC

E(UPBE1PBE) = -2038.90619393 A.U.

|    |              |              |              |   |              |              |              |
|----|--------------|--------------|--------------|---|--------------|--------------|--------------|
| Ru | -0.211728000 | -0.204466000 | 0.137732000  | H | 3.167366000  | 0.323895000  | 5.024084000  |
| N  | -1.298670000 | -0.557793000 | -1.667518000 | C | 1.588395000  | 1.237463000  | 3.882925000  |
| C  | -1.026641000 | 0.104431000  | -2.803034000 | H | 1.467564000  | 2.086178000  | 4.544656000  |
| H  | -0.199730000 | 0.801010000  | -2.762056000 | C | 0.776187000  | 1.136556000  | 2.744896000  |
| N  | -1.944478000 | -1.780780000 | 0.676950000  | H | 0.034270000  | 1.890012000  | 2.514819000  |
| C  | -1.756839000 | -0.092794000 | -3.983698000 | C | 3.594183000  | -1.909957000 | 3.452638000  |
| H  | -1.491874000 | 0.467574000  | -4.871653000 | H | 4.253161000  | -1.879154000 | 4.313356000  |
| N  | 0.993999000  | -1.927798000 | 0.173428000  | C | 3.656057000  | -2.951177000 | 2.571861000  |
| C  | -2.798261000 | -1.001675000 | -3.996084000 | H | 4.365014000  | -3.757514000 | 2.724502000  |
| H  | -3.372149000 | -1.178759000 | -4.899271000 | C | -2.476365000 | 1.645777000  | 0.908581000  |
| N  | 0.874805000  | 0.105985000  | 1.885846000  | H | -2.802448000 | 0.737053000  | 1.403323000  |
| C  | -3.121958000 | -1.700480000 | -2.812781000 | C | -1.577396000 | 3.891924000  | -0.403797000 |
| N  | -1.321522000 | 1.588051000  | 0.237365000  | H | -1.193472000 | 4.754022000  | -0.937998000 |
| C  | -2.350430000 | -1.437420000 | -1.654583000 | C | -2.801080000 | 3.988762000  | 0.307218000  |
| C  | -0.876557000 | 2.713294000  | -0.423938000 | C | -3.262510000 | 2.815565000  | 0.985342000  |
| C  | -2.677095000 | -2.095755000 | -0.424905000 | C | -4.483089000 | 2.855651000  | 1.707859000  |
| N  | 1.844302000  | 0.651418000  | -1.218394000 | H | -4.830973000 | 1.964284000  | 2.220422000  |
| C  | -3.739005000 | -3.031971000 | -0.382909000 | C | -5.213849000 | 4.021321000  | 1.753256000  |
| C  | 2.347143000  | -0.061559000 | -2.281284000 | H | -6.146656000 | 4.057970000  | 2.304138000  |
| C  | -4.009106000 | -3.652758000 | 0.857414000  | C | -4.757184000 | 5.183676000  | 1.082337000  |
| H  | -4.813881000 | -4.376631000 | 0.929964000  | H | -5.349413000 | 6.090513000  | 1.131400000  |
| C  | -3.246560000 | -3.331302000 | 1.966494000  | C | -3.575501000 | 5.172074000  | 0.372275000  |
| H  | -3.434286000 | -3.795498000 | 2.926885000  | H | -3.229865000 | 6.063173000  | -0.140784000 |
| C  | -2.216117000 | -2.384271000 | 1.837680000  | C | 2.612807000  | 1.591196000  | -0.670835000 |
| H  | -1.599048000 | -2.107836000 | 2.685396000  | H | 2.199170000  | 2.135748000  | 0.174065000  |
| C  | -4.487257000 | -3.297286000 | -1.576364000 | C | 3.597929000  | 0.162838000  | -2.801198000 |
| H  | -5.298216000 | -4.016260000 | -1.534009000 | H | 3.950924000  | -0.420760000 | -3.644681000 |
| C  | -4.193699000 | -2.651646000 | -2.740982000 | C | 4.431374000  | 1.164157000  | -2.238263000 |
| H  | -4.769929000 | -2.846810000 | -3.638839000 | C | 3.915067000  | 1.904220000  | -1.127862000 |
| C  | 1.006630000  | -2.946902000 | -0.697305000 | C | 4.707715000  | 2.916996000  | -0.529717000 |
| H  | 0.294376000  | -2.897162000 | -1.510716000 | H | 4.310681000  | 3.478855000  | 0.310300000  |
| C  | 1.890710000  | -4.028022000 | -0.565637000 | C | 5.966724000  | 3.182757000  | -1.019127000 |
| H  | 1.864195000  | -4.827071000 | -1.296114000 | H | 6.575193000  | 3.957867000  | -0.567270000 |
| C  | 2.783724000  | -4.062446000 | 0.492620000  | C | 6.479132000  | 2.449967000  | -2.119035000 |
| H  | 3.474205000  | -4.890840000 | 0.607903000  | H | 7.472393000  | 2.676783000  | -2.490038000 |
| C  | 2.786371000  | -3.008810000 | 1.431672000  | C | 5.730696000  | 1.460293000  | -2.719007000 |
| C  | 1.866932000  | -1.955927000 | 1.228624000  | H | 6.125319000  | 0.903009000  | -3.562082000 |
| C  | 1.803277000  | -0.872820000 | 2.143766000  | H | 1.694560000  | -0.820714000 | -2.694758000 |
| C  | 2.658228000  | -0.837671000 | 3.267483000  | H | 0.055161000  | 2.605519000  | -0.962447000 |
| C  | 2.531448000  | 0.257809000  | 4.147994000  |   |              |              |              |

*cis*-[Ru(phen)<sub>2</sub>(Isoq)<sub>2</sub>]<sup>2+</sup>: <sup>3</sup>TS

E(UPBE1PBE) = -2038.89739882 A.U.

|    |              |              |              |   |              |              |              |
|----|--------------|--------------|--------------|---|--------------|--------------|--------------|
| Ru | -0.014683000 | -0.389017000 | -0.076412000 | H | 3.139079000  | -0.898566000 | 4.961394000  |
| N  | -1.029668000 | -0.408492000 | -1.941563000 | C | 1.658555000  | 0.282090000  | 3.937219000  |
| C  | -0.680950000 | 0.223318000  | -3.073084000 | H | 1.539670000  | 1.005146000  | 4.734574000  |
| H  | 0.274528000  | 0.732223000  | -3.071416000 | C | 0.898776000  | 0.420808000  | 2.768965000  |
| N  | -1.570653000 | -1.831220000 | 0.246238000  | H | 0.194062000  | 1.234326000  | 2.654599000  |
| C  | -1.510603000 | 0.248793000  | -4.202809000 | C | 3.545224000  | -2.839299000 | 3.041340000  |
| H  | -1.181112000 | 0.774994000  | -5.089954000 | H | 4.150557000  | -2.997641000 | 3.927082000  |
| N  | 1.191155000  | -2.112305000 | -0.339319000 | C | 3.600720000  | -3.720059000 | 2.000441000  |
| C  | -2.750478000 | -0.371838000 | -4.160020000 | H | 4.248248000  | -4.588599000 | 2.050096000  |
| H  | -3.416207000 | -0.337400000 | -5.015679000 | C | -2.106870000 | 1.263151000  | 1.327530000  |
| N  | 1.003532000  | -0.436203000 | 1.737961000  | H | -2.133908000 | 0.363655000  | 1.935198000  |
| C  | -3.147853000 | -1.045816000 | -2.988665000 | C | -1.983923000 | 3.495942000  | -0.274342000 |
| N  | -1.200734000 | 1.307304000  | 0.342819000  | H | -1.904460000 | 4.358543000  | -0.926581000 |
| C  | -2.237035000 | -1.067339000 | -1.903599000 | C | -2.953708000 | 3.479651000  | 0.761017000  |
| C  | -1.147302000 | 2.425920000  | -0.461421000 | C | -3.013864000 | 2.311416000  | 1.586305000  |
| C  | -2.561535000 | -1.751305000 | -0.708014000 | C | -3.968029000 | 2.238410000  | 2.634699000  |
| N  | 1.838188000  | 0.749372000  | -0.921317000 | H | -4.012981000 | 1.350117000  | 3.257044000  |
| C  | -3.835338000 | -2.337604000 | -0.539872000 | C | -4.827722000 | 3.291213000  | 2.851235000  |
| C  | 2.619289000  | 0.252313000  | -1.939690000 | H | -5.558751000 | 3.241777000  | 3.650009000  |
| C  | -4.108719000 | -2.965456000 | 0.695589000  | C | -4.768051000 | 4.448737000  | 2.034736000  |
| H  | -5.074713000 | -3.425591000 | 0.868941000  | H | -5.455218000 | 5.265780000  | 2.223742000  |
| C  | -3.115045000 | -3.003445000 | 1.673079000  | C | -3.851253000 | 4.545362000  | 1.009168000  |
| H  | -3.292265000 | -3.504402000 | 2.617462000  | H | -3.809741000 | 5.432589000  | 0.386495000  |
| C  | -1.858720000 | -2.453048000 | 1.419592000  | C | 2.216327000  | 1.876922000  | -0.319175000 |
| H  | -1.046401000 | -2.542083000 | 2.131238000  | H | 1.586472000  | 2.241108000  | 0.486723000  |
| C  | -4.759406000 | -2.279218000 | -1.637254000 | C | 3.763432000  | 0.881924000  | -2.361570000 |
| H  | -5.737036000 | -2.732525000 | -1.513802000 | H | 4.348543000  | 0.456428000  | -3.169629000 |
| C  | -4.422243000 | -1.680408000 | -2.818313000 | C | 4.184776000  | 2.088084000  | -1.743767000 |
| H  | -5.125744000 | -1.660464000 | -3.643520000 | C | 3.375871000  | 2.599659000  | -0.679633000 |
| C  | 1.176983000  | -2.980981000 | -1.361369000 | C | 3.751091000  | 3.801673000  | -0.026515000 |
| H  | 0.518782000  | -2.746147000 | -2.188540000 | H | 3.134666000  | 4.187361000  | 0.779645000  |
| C  | 1.971639000  | -4.134704000 | -1.362823000 | C | 4.889450000  | 4.468574000  | -0.419273000 |
| H  | 1.938794000  | -4.802105000 | -2.214942000 | H | 5.180640000  | 5.388083000  | 0.075408000  |
| C  | 2.795067000  | -4.404004000 | -0.279196000 | C | 5.691701000  | 3.962297000  | -1.472652000 |
| H  | 3.422268000  | -5.288764000 | -0.268390000 | H | 6.584108000  | 4.503740000  | -1.765902000 |
| C  | 2.805661000  | -3.523178000 | 0.821895000  | C | 5.350498000  | 2.796342000  | -2.124305000 |
| C  | 1.972673000  | -2.382192000 | 0.750942000  | H | 5.966981000  | 2.412524000  | -2.930160000 |
| C  | 1.892411000  | -1.480509000 | 1.845218000  | H | 2.284004000  | -0.673278000 | -2.387678000 |
| C  | 2.678050000  | -1.695586000 | 3.001585000  | H | -0.406352000 | 2.409698000  | -1.247781000 |
| C  | 2.548255000  | -0.773772000 | 4.060589000  |   |              |              |              |

*cis*-[Ru(phen)<sub>2</sub>(Isoq)Cl]<sup>1+</sup>: <sup>1</sup>S<sub>0</sub>

E(RPBE1PBE) = -2097.92118423 A.U.

|    |              |              |              |    |              |              |              |
|----|--------------|--------------|--------------|----|--------------|--------------|--------------|
| Ru | -0.433434000 | -0.013359000 | -0.473786000 | H  | -6.170078000 | 1.465202000  | -0.117089000 |
| N  | 0.418631000  | 1.754499000  | -1.108419000 | C  | -4.651803000 | -0.060836000 | 0.127981000  |
| C  | 0.567317000  | 2.194906000  | -2.368027000 | C  | -3.263830000 | -0.296636000 | 0.037866000  |
| H  | 0.138150000  | 1.564976000  | -3.139008000 | C  | -2.732826000 | -1.585893000 | 0.308757000  |
| N  | 0.047389000  | 0.816679000  | 1.330227000  | C  | -3.588697000 | -2.652366000 | 0.655405000  |
| C  | 1.232311000  | 3.399367000  | -2.652225000 | C  | -2.998508000 | -3.915413000 | 0.873381000  |
| H  | 1.329899000  | 3.711968000  | -3.684649000 | H  | -3.619097000 | -4.764968000 | 1.136544000  |
| N  | -2.367171000 | 0.671102000  | -0.328168000 | C  | -1.629108000 | -4.052820000 | 0.728475000  |
| C  | 1.750517000  | 4.170705000  | -1.625440000 | H  | -1.148826000 | -5.013406000 | 0.868357000  |
| H  | 2.263525000  | 5.103264000  | -1.834120000 | C  | -0.843811000 | -2.942558000 | 0.382968000  |
| N  | -1.373750000 | -1.725623000 | 0.191894000  | H  | 0.224320000  | -3.031046000 | 0.241014000  |
| C  | 1.598607000  | 3.733589000  | -0.291417000 | C  | -4.997407000 | -2.393990000 | 0.749855000  |
| N  | 1.491613000  | -0.878418000 | -0.637011000 | H  | -5.655899000 | -3.213243000 | 1.017891000  |
| C  | 0.927961000  | 2.510597000  | -0.084008000 | C  | -5.506361000 | -1.152299000 | 0.499633000  |
| C  | 2.055329000  | -1.074567000 | -1.881686000 | H  | -6.573952000 | -0.972743000 | 0.567449000  |
| C  | 0.714053000  | 2.015588000  | 1.229406000  | C  | 2.207800000  | -1.209295000 | 0.441528000  |
| C  | 1.147352000  | 2.754174000  | 2.351463000  | H  | 1.744835000  | -1.043774000 | 1.407028000  |
| C  | 0.853931000  | 2.230998000  | 3.628921000  | C  | 3.316842000  | -1.590038000 | -2.038912000 |
| H  | 1.167136000  | 2.765078000  | 4.519169000  | H  | 3.712956000  | -1.731064000 | -3.038459000 |
| C  | 0.154116000  | 1.038635000  | 3.723330000  | C  | 4.097541000  | -1.948045000 | -0.911529000 |
| H  | -0.098267000 | 0.618943000  | 4.689626000  | C  | 3.511483000  | -1.748390000 | 0.375750000  |
| C  | -0.234370000 | 0.354533000  | 2.562761000  | C  | 4.244529000  | -2.091607000 | 1.541991000  |
| H  | -0.774518000 | -0.582344000 | 2.610586000  | H  | 3.794773000  | -1.936208000 | 2.518145000  |
| C  | 1.844500000  | 3.988630000  | 2.123522000  | C  | 5.512314000  | -2.614109000 | 1.428014000  |
| H  | 2.191157000  | 4.551671000  | 2.983452000  | H  | 6.075300000  | -2.877514000 | 2.316427000  |
| C  | 2.064520000  | 4.455136000  | 0.858779000  | C  | 6.094518000  | -2.813348000 | 0.150671000  |
| H  | 2.589481000  | 5.391832000  | 0.704260000  | H  | 7.094578000  | -3.227227000 | 0.082478000  |
| C  | -2.830535000 | 1.894563000  | -0.615130000 | C  | 5.404918000  | -2.488388000 | -0.996855000 |
| H  | -2.098958000 | 2.628849000  | -0.923221000 | H  | 5.851015000  | -2.642145000 | -1.973929000 |
| C  | -4.195700000 | 2.209905000  | -0.539865000 | H  | 1.417123000  | -0.829771000 | -2.718861000 |
| H  | -4.518611000 | 3.214275000  | -0.784332000 | Cl | -1.040191000 | -0.729006000 | -2.727803000 |
| C  | -5.110616000 | 1.239713000  | -0.170225000 |    |              |              |              |

***cis*-[Ru(phen)<sub>2</sub>(Isoq)Cl]<sup>1+</sup>: <sup>3</sup>MLCT**

E(UPBE1PBE) = -2097.86269702 A.U.

|    |              |              |              |    |              |              |              |
|----|--------------|--------------|--------------|----|--------------|--------------|--------------|
| Ru | -0.444864000 | -0.044294000 | -0.563444000 | H  | -6.048445000 | 1.792382000  | 0.092445000  |
| N  | 0.522207000  | 1.695778000  | -1.164728000 | C  | -4.636160000 | 0.154770000  | 0.209841000  |
| C  | 0.764791000  | 2.133056000  | -2.408457000 | C  | -3.274870000 | -0.171744000 | 0.038803000  |
| H  | 0.339486000  | 1.544596000  | -3.212690000 | C  | -2.817775000 | -1.498115000 | 0.256147000  |
| N  | -0.025891000 | 0.751262000  | 1.253032000  | C  | -3.725717000 | -2.514461000 | 0.621763000  |
| C  | 1.517283000  | 3.289544000  | -2.654395000 | C  | -3.204573000 | -3.814833000 | 0.792428000  |
| H  | 1.681348000  | 3.603205000  | -3.677306000 | H  | -3.865258000 | -4.629450000 | 1.068379000  |
| N  | -2.342433000 | 0.747882000  | -0.347779000 | C  | -1.852436000 | -4.036758000 | 0.594018000  |
| C  | 2.041730000  | 4.017613000  | -1.586179000 | H  | -1.429228000 | -5.027138000 | 0.705334000  |
| H  | 2.626782000  | 4.913696000  | -1.766045000 | C  | -1.011880000 | -2.971005000 | 0.236594000  |
| N  | -1.478766000 | -1.725942000 | 0.082719000  | H  | 0.045603000  | -3.117212000 | 0.062595000  |
| C  | 1.806642000  | 3.592961000  | -0.271822000 | C  | -5.108351000 | -2.167322000 | 0.789464000  |
| N  | 1.476498000  | -0.928478000 | -0.646425000 | H  | -5.806672000 | -2.947514000 | 1.072068000  |
| C  | 1.031199000  | 2.409077000  | -0.087949000 | C  | -5.543881000 | -0.887532000 | 0.596766000  |
| C  | 2.057688000  | -1.204193000 | -1.866803000 | H  | -6.591690000 | -0.639426000 | 0.726161000  |
| C  | 0.738106000  | 1.918583000  | 1.185030000  | C  | 2.167225000  | -1.176231000 | 0.470545000  |
| C  | 1.181556000  | 2.597910000  | 2.347409000  | H  | 1.686949000  | -0.929572000 | 1.409672000  |
| C  | 0.810460000  | 2.080948000  | 3.600825000  | C  | 3.320117000  | -1.730176000 | -1.963848000 |
| H  | 1.129730000  | 2.572816000  | 4.511847000  | H  | 3.737126000  | -1.933858000 | -2.943668000 |
| C  | -0.017025000 | 0.926464000  | 3.653689000  | C  | 4.078348000  | -2.008114000 | -0.798829000 |
| H  | -0.341877000 | 0.534487000  | 4.610203000  | C  | 3.471157000  | -1.715900000 | 0.461032000  |
| C  | -0.425798000 | 0.303763000  | 2.499679000  | C  | 4.183856000  | -1.968484000 | 1.662376000  |
| H  | -1.064449000 | -0.570647000 | 2.510358000  | H  | 3.718308000  | -1.737474000 | 2.615471000  |
| C  | 1.972219000  | 3.783704000  | 2.153143000  | C  | 5.453547000  | -2.495836000 | 1.607511000  |
| H  | 2.327818000  | 4.308544000  | 3.033824000  | H  | 6.003189000  | -2.689214000 | 2.521714000  |
| C  | 2.273060000  | 4.258805000  | 0.904327000  | C  | 6.055937000  | -2.788866000 | 0.357996000  |
| H  | 2.868663000  | 5.158798000  | 0.791000000  | H  | 7.057711000  | -3.203650000 | 0.337216000  |
| C  | -2.717659000 | 2.013030000  | -0.565699000 | C  | 5.386422000  | -2.551202000 | -0.822770000 |
| H  | -1.944020000 | 2.701804000  | -0.876697000 | H  | 5.850483000  | -2.774300000 | -1.777696000 |
| C  | -4.052022000 | 2.416546000  | -0.407908000 | H  | 1.447111000  | -0.996212000 | -2.733544000 |
| H  | -4.316626000 | 3.449083000  | -0.597266000 | Cl | -1.062701000 | -0.668407000 | -2.788795000 |
| C  | -5.012098000 | 1.494765000  | -0.024739000 |    |              |              |              |

*cis*-[Ru(phen)<sub>2</sub>(Isoq)Cl]<sup>1+</sup>: <sup>3</sup>MC

E(UPBE1PBE) = -2097.84840801 A.U.

|    |              |              |              |    |              |              |              |
|----|--------------|--------------|--------------|----|--------------|--------------|--------------|
| Ru | -0.528795000 | -0.007416000 | -0.521704000 | H  | -6.541838000 | 1.524877000  | -0.116264000 |
| N  | 0.598206000  | 1.543075000  | -1.287607000 | C  | -4.983910000 | 0.050468000  | 0.169071000  |
| C  | 0.874293000  | 1.785840000  | -2.582273000 | C  | -3.583167000 | -0.143585000 | 0.111747000  |
| H  | 0.435113000  | 1.097548000  | -3.294198000 | C  | -3.025564000 | -1.433250000 | 0.385043000  |
| N  | 0.013515000  | 1.006988000  | 1.239120000  | C  | -3.880469000 | -2.502501000 | 0.743181000  |
| C  | 1.676298000  | 2.866399000  | -2.975793000 | C  | -3.294607000 | -3.759466000 | 1.001682000  |
| H  | 1.868564000  | 3.016480000  | -4.031015000 | H  | -3.923778000 | -4.599662000 | 1.275140000  |
| N  | -2.724636000 | 0.861226000  | -0.201837000 | C  | -1.924697000 | -3.903234000 | 0.889471000  |
| C  | 2.209631000  | 3.725393000  | -2.028014000 | H  | -1.444568000 | -4.856742000 | 1.070999000  |
| H  | 2.829325000  | 4.565162000  | -2.323011000 | C  | -1.141502000 | -2.802495000 | 0.515825000  |
| N  | -1.670021000 | -1.593995000 | 0.272207000  | H  | -0.069913000 | -2.880833000 | 0.392295000  |
| C  | 1.934614000  | 3.497407000  | -0.663975000 | C  | -5.295272000 | -2.273699000 | 0.811404000  |
| N  | 1.638409000  | -1.324503000 | -0.305500000 | H  | -5.937607000 | -3.104825000 | 1.082388000  |
| C  | 1.124810000  | 2.387167000  | -0.340275000 | C  | -5.827513000 | -1.050756000 | 0.529574000  |
| C  | 2.023752000  | -1.984605000 | -1.450547000 | H  | -6.899996000 | -0.892813000 | 0.570816000  |
| C  | 0.804485000  | 2.103540000  | 1.011368000  | C  | 2.529758000  | -1.157351000 | 0.666626000  |
| C  | 1.279236000  | 2.932595000  | 2.053092000  | H  | 2.192174000  | -0.636143000 | 1.558064000  |
| C  | 0.905137000  | 2.595599000  | 3.370190000  | C  | 3.294089000  | -2.478835000 | -1.618165000 |
| H  | 1.246842000  | 3.204086000  | 4.200638000  | H  | 3.556762000  | -2.997864000 | -2.533710000 |
| C  | 0.097804000  | 1.489069000  | 3.588718000  | C  | 4.264543000  | -2.313850000 | -0.595891000 |
| H  | -0.206310000 | 1.212962000  | 4.590860000  | C  | 3.864202000  | -1.624515000 | 0.590740000  |
| C  | -0.333592000 | 0.714630000  | 2.503134000  | C  | 4.797542000  | -1.437157000 | 1.642360000  |
| H  | -0.966826000 | -0.152555000 | 2.638709000  | H  | 4.485378000  | -0.914781000 | 2.541858000  |
| C  | 2.103740000  | 4.055588000  | 1.707650000  | C  | 6.081501000  | -1.917262000 | 1.518469000  |
| H  | 2.472707000  | 4.692276000  | 2.504592000  | H  | 6.796636000  | -1.777162000 | 2.321441000  |
| C  | 2.418701000  | 4.323330000  | 0.406367000  | C  | 6.480442000  | -2.600438000 | 0.342331000  |
| H  | 3.042301000  | 5.175526000  | 0.157901000  | H  | 7.496154000  | -2.972439000 | 0.263582000  |
| C  | -3.209304000 | 2.069513000  | -0.490588000 | C  | 5.594277000  | -2.796148000 | -0.694091000 |
| H  | -2.483157000 | 2.833982000  | -0.741611000 | H  | 5.901121000  | -3.320421000 | -1.593305000 |
| C  | -4.587238000 | 2.346407000  | -0.475757000 | H  | 1.256637000  | -2.081183000 | -2.209330000 |
| H  | -4.939141000 | 3.340509000  | -0.722852000 | Cl | -1.098835000 | -0.894874000 | -2.686826000 |
| C  | -5.473304000 | 1.338474000  | -0.140611000 |    |              |              |              |

***cis*-[Ru(phen)<sub>2</sub>(Isoq)Cl]<sup>1+</sup>: <sup>3</sup>TS**

E(UPBE1PBE) = -2097.84598412 A.U.

|    |              |              |              |    |              |              |              |
|----|--------------|--------------|--------------|----|--------------|--------------|--------------|
| Ru | -0.463895000 | -0.110881000 | -0.491883000 | H  | -6.302344000 | 1.503672000  | -0.316642000 |
| N  | 0.571455000  | 1.487241000  | -1.283799000 | C  | -4.798011000 | -0.000208000 | 0.087948000  |
| C  | 0.843657000  | 1.698531000  | -2.584051000 | C  | -3.404187000 | -0.231533000 | 0.092616000  |
| H  | 0.488953000  | 0.937957000  | -3.268922000 | C  | -2.889903000 | -1.518146000 | 0.421906000  |
| N  | 0.078445000  | 0.975262000  | 1.293431000  | C  | -3.770733000 | -2.557654000 | 0.797679000  |
| C  | 1.526877000  | 2.841665000  | -3.020430000 | C  | -3.207029000 | -3.811904000 | 1.111428000  |
| H  | 1.727301000  | 2.959135000  | -4.078128000 | H  | -3.850707000 | -4.634734000 | 1.403001000  |
| N  | -2.498253000 | 0.741142000  | -0.215415000 | C  | -1.836185000 | -3.977845000 | 1.026836000  |
| C  | 1.923878000  | 3.807789000  | -2.108514000 | H  | -1.374615000 | -4.931512000 | 1.250663000  |
| H  | 2.438744000  | 4.704464000  | -2.436073000 | C  | -1.027376000 | -2.906152000 | 0.621974000  |
| N  | -1.534537000 | -1.700534000 | 0.327145000  | H  | 0.043254000  | -3.013249000 | 0.514121000  |
| C  | 1.643797000  | 3.618761000  | -0.740944000 | C  | -5.180926000 | -2.293700000 | 0.814290000  |
| N  | 1.627393000  | -1.242603000 | -0.325591000 | H  | -5.852257000 | -3.097481000 | 1.096929000  |
| C  | 0.981400000  | 2.426529000  | -0.365451000 | C  | -5.675238000 | -1.071314000 | 0.462944000  |
| C  | 1.969709000  | -2.081211000 | -1.364085000 | H  | -6.744924000 | -0.891172000 | 0.458698000  |
| C  | 0.674959000  | 2.175618000  | 0.997327000  | C  | 2.545154000  | -0.949104000 | 0.591778000  |
| C  | 0.971198000  | 3.141492000  | 1.989177000  | H  | 2.236903000  | -0.287087000 | 1.394069000  |
| C  | 0.597321000  | 2.847444000  | 3.315395000  | C  | 3.223977000  | -2.627416000 | -1.476414000 |
| H  | 0.809678000  | 3.558989000  | 4.105960000  | H  | 3.452600000  | -3.286341000 | -2.307025000 |
| C  | -0.045942000 | 1.646772000  | 3.595397000  | C  | 4.221800000  | -2.334005000 | -0.511059000 |
| H  | -0.343682000 | 1.400088000  | 4.607161000  | C  | 3.864497000  | -1.459400000 | 0.561700000  |
| C  | -0.290501000 | 0.733686000  | 2.565068000  | C  | 4.825106000  | -1.137226000 | 1.554715000  |
| H  | -0.771546000 | -0.218566000 | 2.750612000  | H  | 4.546174000  | -0.473059000 | 2.367261000  |
| C  | 1.635589000  | 4.349438000  | 1.588372000  | C  | 6.093919000  | -1.665789000 | 1.482675000  |
| H  | 1.870283000  | 5.087423000  | 2.348067000  | H  | 6.830191000  | -1.422590000 | 2.240601000  |
| C  | 1.968955000  | 4.570514000  | 0.283391000  | C  | 6.450004000  | -2.532191000 | 0.418933000  |
| H  | 2.476605000  | 5.484702000  | -0.005618000 | H  | 7.454748000  | -2.938566000 | 0.379666000  |
| C  | -2.941951000 | 1.953296000  | -0.571374000 | C  | 5.536647000  | -2.861191000 | -0.558760000 |
| H  | -2.188014000 | 2.694433000  | -0.807894000 | H  | 5.811134000  | -3.524966000 | -1.372102000 |
| C  | -4.310224000 | 2.256551000  | -0.627581000 | H  | 1.185009000  | -2.269550000 | -2.086265000 |
| H  | -4.624903000 | 3.250177000  | -0.922216000 | Cl | -1.052939000 | -1.033329000 | -2.659855000 |
| C  | -5.240031000 | 1.286179000  | -0.290541000 |    |              |              |              |

*cis*-[Ru(phen)<sub>2</sub>(phthz)<sub>2</sub>]<sup>2+</sup>: <sup>1</sup>S<sub>0</sub>

E(RPBE1PBE) = -2070.95486607 A.U.

|    |              |              |              |   |              |              |              |
|----|--------------|--------------|--------------|---|--------------|--------------|--------------|
| Ru | -0.001280000 | -0.346655000 | 0.048384000  | C | -2.544922000 | -0.927006000 | -4.078265000 |
| N  | 1.074472000  | -0.451245000 | 1.830079000  | H | -3.133846000 | -1.099133000 | -4.972506000 |
| C  | 0.848139000  | 0.207393000  | 2.974440000  | C | -1.638082000 | 0.117104000  | -4.016445000 |
| H  | -0.029285000 | 0.834980000  | 2.999488000  | H | -1.499248000 | 0.783011000  | -4.859369000 |
| N  | 1.524063000  | -1.651124000 | -0.502901000 | C | -0.886536000 | 0.322942000  | -2.849229000 |
| C  | 1.690038000  | 0.069979000  | 4.091289000  | H | -0.172511000 | 1.133930000  | -2.780021000 |
| H  | 1.459376000  | 0.621830000  | 4.994075000  | C | -3.615891000 | -2.877182000 | -2.908468000 |
| N  | -1.225679000 | -1.975949000 | 0.405104000  | H | -4.223451000 | -3.085819000 | -3.782217000 |
| C  | 2.790928000  | -0.764394000 | 4.031887000  | C | -3.726664000 | -3.650829000 | -1.788697000 |
| H  | 3.444166000  | -0.887085000 | 4.888936000  | H | -4.424380000 | -4.480816000 | -1.763291000 |
| N  | -1.005828000 | -0.466623000 | -1.769234000 | C | 2.116992000  | 1.347065000  | -1.324560000 |
| C  | 3.061940000  | -1.462371000 | 2.833691000  | H | 2.200609000  | 0.466966000  | -1.951397000 |
| N  | 1.184422000  | 1.305106000  | -0.376153000 | C | 1.798051000  | 3.427376000  | 0.348728000  |
| C  | 2.178486000  | -1.262387000 | 1.751421000  | H | 1.613260000  | 4.224821000  | 1.060111000  |
| N  | 1.015491000  | 2.371106000  | 0.488308000  | C | 2.814617000  | 3.558054000  | -0.633474000 |
| C  | 2.407181000  | -1.920073000 | 0.511289000  | C | 2.978922000  | 2.454011000  | -1.516968000 |
| N  | -1.531492000 | 0.850185000  | 0.759175000  | C | 3.972513000  | 2.501937000  | -2.521607000 |
| C  | 3.497051000  | -2.806386000 | 0.362438000  | H | 4.103180000  | 1.660974000  | -3.194860000 |
| N  | -2.086554000 | 0.437556000  | 1.952484000  | C | 4.770031000  | 3.623572000  | -2.631820000 |
| C  | 3.651514000  | -3.445320000 | -0.887250000 | H | 5.535256000  | 3.669871000  | -3.398323000 |
| H  | 4.472359000  | -4.136734000 | -1.043142000 | C | 4.604462000  | 4.721235000  | -1.753444000 |
| C  | 2.744331000  | -3.182165000 | -1.898910000 | H | 5.244955000  | 5.588945000  | -1.862458000 |
| H  | 2.832841000  | -3.664334000 | -2.864672000 | C | 3.640516000  | 4.694371000  | -0.764254000 |
| C  | 1.692976000  | -2.279541000 | -1.677312000 | H | 3.513281000  | 5.533682000  | -0.088785000 |
| H  | 0.971009000  | -2.058877000 | -2.452767000 | C | -2.002498000 | 1.917642000  | 0.128000000  |
| C  | 4.377298000  | -3.005629000 | 1.477630000  | H | -1.506201000 | 2.186981000  | -0.795017000 |
| H  | 5.215466000  | -3.684000000 | 1.361987000  | C | -3.106690000 | 1.118339000  | 2.445577000  |
| C  | 4.171349000  | -2.355920000 | 2.660631000  | H | -3.494901000 | 0.740221000  | 3.384943000  |
| H  | 4.846001000  | -2.510199000 | 3.495713000  | C | -3.683050000 | 2.262079000  | 1.833736000  |
| C  | -1.326289000 | -2.691463000 | 1.531706000  | C | -3.090821000 | 2.684547000  | 0.610898000  |
| H  | -0.704203000 | -2.379905000 | 2.358614000  | C | -3.601330000 | 3.819809000  | -0.058776000 |
| C  | -2.205338000 | -3.781237000 | 1.643233000  | H | -3.152330000 | 4.144873000  | -0.991630000 |
| H  | -2.246578000 | -4.332605000 | 2.574320000  | C | -4.669966000 | 4.504026000  | 0.485393000  |
| C  | -3.006896000 | -4.135616000 | 0.572769000  | H | -5.068421000 | 5.376028000  | -0.020696000 |
| H  | -3.690376000 | -4.974599000 | 0.644168000  | C | -5.257847000 | 4.082338000  | 1.701830000  |
| C  | -2.933123000 | -3.386525000 | -0.622463000 | H | -6.096035000 | 4.637925000  | 2.106580000  |
| C  | -2.022460000 | -2.309456000 | -0.656873000 | C | -4.774445000 | 2.975747000  | 2.372450000  |
| C  | -1.908245000 | -1.501022000 | -1.820911000 | H | -5.223233000 | 2.650784000  | 3.305154000  |
| C  | -2.701697000 | -1.772042000 | -2.957618000 |   |              |              |              |



*cis*-[Ru(phen)<sub>2</sub>(phthz)<sub>2</sub>]<sup>2+</sup>: <sup>3</sup>MLCT

E(UPBE1PBE) = -2070.87862800 A.U.

|    |              |              |              |   |              |              |              |
|----|--------------|--------------|--------------|---|--------------|--------------|--------------|
| Ru | 0.005813000  | -0.238512000 | -0.031247000 | C | -2.907195000 | -0.966199000 | -3.912390000 |
| N  | 1.151898000  | -0.370997000 | 1.680117000  | H | -3.559638000 | -1.185658000 | -4.750600000 |
| C  | 1.053554000  | 0.321405000  | 2.839195000  | C | -2.077674000 | 0.140133000  | -3.931545000 |
| H  | 0.266525000  | 1.060292000  | 2.892546000  | H | -2.062629000 | 0.809225000  | -4.782893000 |
| N  | 1.412806000  | -1.558687000 | -0.682305000 | C | -1.235327000 | 0.405376000  | -2.838560000 |
| C  | 1.888851000  | 0.076810000  | 3.921703000  | H | -0.583771000 | 1.269172000  | -2.813089000 |
| H  | 1.761363000  | 0.652669000  | 4.829265000  | C | -3.722444000 | -2.986152000 | -2.659004000 |
| N  | -1.114336000 | -1.917654000 | 0.427124000  | H | -4.389316000 | -3.240749000 | -3.475296000 |
| C  | 2.880629000  | -0.919373000 | 3.836885000  | C | -3.670347000 | -3.767549000 | -1.539664000 |
| H  | 3.526310000  | -1.122758000 | 4.684182000  | H | -4.295156000 | -4.649963000 | -1.456922000 |
| N  | -1.201412000 | -0.390093000 | -1.760660000 | C | 2.518694000  | 1.394577000  | -0.387377000 |
| C  | 3.034095000  | -1.638356000 | 2.653053000  | H | 2.926946000  | 0.535915000  | 0.130073000  |
| N  | 1.212195000  | 1.375669000  | -0.631923000 | C | 1.339899000  | 3.448123000  | -1.673994000 |
| C  | 2.158238000  | -1.334127000 | 1.565458000  | H | 0.800004000  | 4.233525000  | -2.191473000 |
| N  | 0.605577000  | 2.415723000  | -1.299205000 | C | 2.737244000  | 3.560967000  | -1.447070000 |
| C  | 2.286043000  | -1.965526000 | 0.331355000  | C | 3.354383000  | 2.467681000  | -0.774108000 |
| N  | -1.500710000 | 0.989062000  | 0.799626000  | C | 4.743601000  | 2.490796000  | -0.517757000 |
| C  | 3.273838000  | -2.968542000 | 0.115458000  | H | 5.213331000  | 1.657721000  | -0.005813000 |
| N  | -1.977185000 | 0.481610000  | 1.990678000  | C | 5.486237000  | 3.581854000  | -0.925601000 |
| C  | 3.350843000  | -3.556710000 | -1.146741000 | H | 6.552829000  | 3.612415000  | -0.735226000 |
| H  | 4.089584000  | -4.323601000 | -1.348804000 | C | 4.871535000  | 4.667620000  | -1.592724000 |
| C  | 2.453174000  | -3.141304000 | -2.162937000 | H | 5.478272000  | 5.511239000  | -1.901609000 |
| H  | 2.504022000  | -3.583194000 | -3.150091000 | C | 3.513082000  | 4.664115000  | -1.854147000 |
| C  | 1.513001000  | -2.168410000 | -1.906690000 | H | 3.044432000  | 5.497169000  | -2.366895000 |
| H  | 0.822206000  | -1.833474000 | -2.669386000 | C | -2.038656000 | 2.065784000  | 0.240892000  |
| C  | 4.130804000  | -3.295572000 | 1.227987000  | H | -1.567766000 | 2.404780000  | -0.674685000 |
| H  | 4.882711000  | -4.064338000 | 1.084253000  | C | -3.003482000 | 1.085183000  | 2.562594000  |
| C  | 4.020235000  | -2.661658000 | 2.431376000  | H | -3.332515000 | 0.638617000  | 3.494194000  |
| H  | 4.685383000  | -2.921201000 | 3.248324000  | C | -3.653500000 | 2.235506000  | 2.039447000  |
| C  | -1.037298000 | -2.640312000 | 1.551785000  | C | -3.134253000 | 2.753287000  | 0.819075000  |
| H  | -0.357467000 | -2.285922000 | 2.312990000  | C | -3.719393000 | 3.901261000  | 0.239313000  |
| C  | -1.818733000 | -3.791906000 | 1.732715000  | H | -3.325786000 | 4.298232000  | -0.690451000 |
| H  | -1.726294000 | -4.351496000 | 2.654883000  | C | -4.791961000 | 4.504942000  | 0.866174000  |
| C  | -2.692084000 | -4.198201000 | 0.738897000  | H | -5.248641000 | 5.385828000  | 0.429572000  |
| H  | -3.298584000 | -5.088415000 | 0.865722000  | C | -5.307450000 | 3.988174000  | 2.078147000  |
| C  | -2.794157000 | -3.443039000 | -0.451890000 | H | -6.149576000 | 4.481745000  | 2.549649000  |
| C  | -1.976900000 | -2.298659000 | -0.561936000 | C | -4.748705000 | 2.867172000  | 2.663185000  |
| C  | -2.026048000 | -1.486186000 | -1.726827000 | H | -5.142117000 | 2.471597000  | 3.593497000  |
| C  | -2.901089000 | -1.817527000 | -2.784602000 |   |              |              |              |

*cis*-[Ru(phen)<sub>2</sub>(phthz)<sub>2</sub>]<sup>2+</sup>: <sup>3</sup>MC

E(UPBE1PBE) = -2070.87531567 A.U.

|    |              |              |              |   |              |              |              |
|----|--------------|--------------|--------------|---|--------------|--------------|--------------|
| Ru | -0.120754000 | -0.196431000 | 0.235629000  | C | 2.517040000  | -0.841168000 | 4.305060000  |
| N  | -1.277994000 | -0.277093000 | -1.586429000 | H | 3.110117000  | -1.033962000 | 5.192510000  |
| C  | -1.043531000 | 0.562280000  | -2.606207000 | C | 1.672941000  | 0.254921000  | 4.242284000  |
| H  | -0.264689000 | 1.294042000  | -2.448584000 | H | 1.589805000  | 0.940269000  | 5.076571000  |
| N  | -1.865250000 | -1.871182000 | 0.544763000  | C | 0.915534000  | 0.489758000  | 3.085724000  |
| C  | -1.743929000 | 0.486302000  | -3.819342000 | H | 0.270368000  | 1.352542000  | 2.995501000  |
| H  | -1.510429000 | 1.187178000  | -4.610950000 | C | 3.462345000  | -2.862339000 | 3.148591000  |
| N  | 1.055877000  | -1.884311000 | -0.131769000 | H | 4.071866000  | -3.091814000 | 4.015738000  |
| C  | -2.709345000 | -0.487612000 | -3.988434000 | C | 3.516253000  | -3.652666000 | 2.036498000  |
| H  | -3.254322000 | -0.576089000 | -4.922159000 | H | 4.170229000  | -4.517444000 | 2.009503000  |
| N  | 0.970753000  | -0.326195000 | 2.019911000  | C | -2.562130000 | 1.561244000  | 0.661139000  |
| C  | -2.992632000 | -1.374764000 | -2.926703000 | H | -3.073249000 | 0.646964000  | 0.385534000  |
| N  | -1.236784000 | 1.494425000  | 0.723816000  | C | -1.117615000 | 3.732261000  | 1.338713000  |
| C  | -2.257961000 | -1.226657000 | -1.725063000 | H | -0.474189000 | 4.562161000  | 1.609708000  |
| N  | -0.488156000 | 2.597252000  | 1.086542000  | C | -2.526562000 | 3.900064000  | 1.284217000  |
| C  | -2.552451000 | -2.078813000 | -0.609905000 | C | -3.286255000 | 2.746472000  | 0.937490000  |
| N  | 1.649166000  | 0.928732000  | -1.043699000 | C | -4.695531000 | 2.826931000  | 0.877214000  |
| C  | -3.545306000 | -3.082372000 | -0.727839000 | H | -5.277068000 | 1.949232000  | 0.615310000  |
| N  | 2.111380000  | 0.239196000  | -2.147557000 | C | -5.317231000 | 4.028777000  | 1.153776000  |
| C  | -3.793098000 | -3.887151000 | 0.407213000  | H | -6.397958000 | 4.101243000  | 1.110123000  |
| H  | -4.543306000 | -4.669136000 | 0.355838000  | C | -4.561125000 | 5.174811000  | 1.496204000  |
| C  | -3.080331000 | -3.667981000 | 1.572399000  | H | -5.075040000 | 6.105310000  | 1.708494000  |
| H  | -3.254790000 | -4.270310000 | 2.455472000  | C | -3.181991000 | 5.117298000  | 1.563047000  |
| C  | -2.118851000 | -2.642576000 | 1.604452000  | H | -2.601591000 | 5.994841000  | 1.827358000  |
| H  | -1.545151000 | -2.439912000 | 2.501880000  | C | 2.330997000  | 1.950212000  | -0.546306000 |
| C  | -4.251606000 | -3.228375000 | -1.966241000 | H | 1.872640000  | 2.440662000  | 0.306996000  |
| H  | -5.005849000 | -4.003586000 | -2.047853000 | C | 3.254479000  | 0.616017000  | -2.695682000 |
| C  | -3.988837000 | -2.402942000 | -3.019506000 | H | 3.562298000  | 0.041047000  | -3.562355000 |
| H  | -4.533276000 | -2.509763000 | -3.951524000 | C | 4.055060000  | 1.691896000  | -2.223644000 |
| C  | 1.105748000  | -2.613807000 | -1.254203000 | C | 3.564416000  | 2.397307000  | -1.088911000 |
| H  | 0.486313000  | -2.283487000 | -2.075237000 | C | 4.301021000  | 3.483313000  | -0.565569000 |
| C  | 1.934641000  | -3.740668000 | -1.369897000 | H | 3.926557000  | 4.022083000  | 0.298659000  |
| H  | 1.937406000  | -4.300744000 | -2.296661000 | C | 5.492048000  | 3.846012000  | -1.162696000 |
| C  | 2.735966000  | -4.122176000 | -0.307988000 | H | 6.064691000  | 4.678101000  | -0.768926000 |
| H  | 3.378439000  | -4.992849000 | -0.382236000 | C | 5.979520000  | 3.143670000  | -2.290342000 |
| C  | 2.717850000  | -3.360414000 | 0.880574000  | H | 6.916697000  | 3.449758000  | -2.741217000 |
| C  | 1.859341000  | -2.240220000 | 0.918680000  | C | 5.274649000  | 2.079832000  | -2.818910000 |
| C  | 1.809497000  | -1.413249000 | 2.070211000  | H | 5.646368000  | 1.541938000  | -3.684706000 |
| C  | 2.608199000  | -1.710274000 | 3.196657000  |   |              |              |              |

***cis*-[Ru(phen)<sub>2</sub>(phthz)<sub>2</sub>]<sup>2+</sup>: <sup>3</sup>TS**

E(UPBE1PBE) = -2070.86827647 A.U.

|    |              |              |              |   |              |              |              |
|----|--------------|--------------|--------------|---|--------------|--------------|--------------|
| Ru | 0.055030000  | -0.192712000 | -0.052519000 | C | -2.752946000 | -1.749381000 | -2.910492000 |
| N  | 1.300046000  | -0.332982000 | 1.634530000  | C | -2.805813000 | -0.816386000 | -3.968221000 |
| C  | 1.158586000  | 0.364188000  | 2.772418000  | H | -3.447528000 | -1.002972000 | -4.822463000 |
| H  | 0.355527000  | 1.086877000  | 2.795089000  | C | -2.038404000 | 0.333664000  | -3.895798000 |
| N  | 1.758639000  | -1.485781000 | -0.768955000 | H | -2.062811000 | 1.068288000  | -4.691134000 |
| C  | 1.971111000  | 0.134356000  | 3.891572000  | C | -1.216992000 | 0.562283000  | -2.780927000 |
| H  | 1.813347000  | 0.719186000  | 4.788896000  | H | -0.629218000 | 1.465332000  | -2.678211000 |
| N  | -0.942853000 | -1.994848000 | 0.280058000  | C | -3.523396000 | -2.958964000 | -2.867038000 |
| C  | 2.937402000  | -0.858622000 | 3.846756000  | H | -4.180114000 | -3.184675000 | -3.700013000 |
| H  | 3.550660000  | -1.074113000 | 4.715237000  | C | -3.444331000 | -3.807540000 | -1.799976000 |
| N  | -1.131247000 | -0.316271000 | -1.769423000 | H | -4.039327000 | -4.713851000 | -1.774473000 |
| C  | 3.118887000  | -1.600053000 | 2.661623000  | C | 2.521027000  | 1.576581000  | -0.554230000 |
| N  | 1.198318000  | 1.526144000  | -0.666810000 | H | 3.007605000  | 0.661239000  | -0.243986000 |
| C  | 2.299251000  | -1.276970000 | 1.550835000  | C | 1.139340000  | 3.746436000  | -1.351542000 |
| N  | 0.485970000  | 2.627702000  | -1.090217000 | H | 0.520998000  | 4.575600000  | -1.677688000 |
| C  | 2.469061000  | -1.954833000 | 0.311560000  | C | 2.547367000  | 3.897043000  | -1.241561000 |
| N  | -1.526931000 | 1.062914000  | 0.910741000  | C | 3.273917000  | 2.742993000  | -0.830752000 |
| C  | 3.366077000  | -3.046351000 | 0.219108000  | C | 4.680843000  | 2.803679000  | -0.714556000 |
| N  | -1.943681000 | 0.420354000  | 2.061089000  | H | 5.236334000  | 1.925057000  | -0.403880000 |
| C  | 3.451766000  | -3.719736000 | -1.018244000 | C | 5.332639000  | 3.987499000  | -0.999508000 |
| H  | 4.122905000  | -4.563860000 | -1.129732000 | H | 6.411707000  | 4.045347000  | -0.913928000 |
| C  | 2.677393000  | -3.279399000 | -2.086489000 | C | 4.609060000  | 5.133940000  | -1.404808000 |
| H  | 2.735900000  | -3.771078000 | -3.050139000 | H | 5.145941000  | 6.050255000  | -1.622085000 |
| C  | 1.856484000  | -2.158578000 | -1.937170000 | C | 3.232599000  | 5.095453000  | -1.527273000 |
| H  | 1.293748000  | -1.757496000 | -2.771619000 | H | 2.678327000  | 5.973725000  | -1.840574000 |
| C  | 4.153449000  | -3.388373000 | 1.369486000  | C | -2.239298000 | 2.049018000  | 0.379781000  |
| H  | 4.843894000  | -4.221521000 | 1.293382000  | H | -1.805747000 | 2.512434000  | -0.499032000 |
| C  | 4.055944000  | -2.677412000 | 2.531252000  | C | -3.075838000 | 0.804344000  | 2.623556000  |
| H  | 4.673957000  | -2.932272000 | 3.385416000  | H | -3.344549000 | 0.268553000  | 3.527323000  |
| C  | -0.864475000 | -2.778724000 | 1.366324000  | C | -3.910009000 | 1.840578000  | 2.121720000  |
| H  | -0.197028000 | -2.456138000 | 2.152800000  | C | -3.464171000 | 2.495088000  | 0.937911000  |
| C  | -1.616314000 | -3.956489000 | 1.481761000  | C | -4.235122000 | 3.542437000  | 0.385254000  |
| H  | -1.517692000 | -4.560395000 | 2.375102000  | H | -3.896196000 | 4.044846000  | -0.514710000 |
| C  | -2.467328000 | -4.337697000 | 0.457148000  | C | -5.414286000 | 3.914994000  | 1.000247000  |
| H  | -3.047538000 | -5.251088000 | 0.530350000  | H | -6.011954000 | 4.717851000  | 0.583643000  |
| C  | -2.582282000 | -3.521451000 | -0.689150000 | C | -5.856652000 | 3.262411000  | 2.174982000  |
| C  | -1.800010000 | -2.347163000 | -0.728583000 | H | -6.785062000 | 3.575680000  | 2.638657000  |
| C  | -1.891087000 | -1.458590000 | -1.829954000 | C | -5.117098000 | 2.237392000  | 2.733838000  |
|    |              |              |              | H | -5.453336000 | 1.737898000  | 3.636341000  |

***cis*-[Ru(phen)<sub>2</sub>(phthz)Cl]<sup>1+</sup>: <sup>1</sup>S<sub>0</sub>**

E(RPBE1PBE) = -2113.90703813 A.U.

|    |              |              |              |   |              |              |              |
|----|--------------|--------------|--------------|---|--------------|--------------|--------------|
| Ru | -0.365720000 | -0.075012000 | -0.292267000 | H | -0.656156000 | 1.343507000  | 4.707632000  |
| N  | -1.452325000 | -1.634312000 | 0.515422000  | C | 0.354785000  | 2.825690000  | 3.521536000  |
| C  | -0.996338000 | -2.744778000 | 1.112028000  | H | 0.546035000  | 3.501766000  | 4.347638000  |
| H  | 0.067600000  | -2.785037000 | 1.296867000  | C | 0.786973000  | 3.160967000  | 2.220476000  |
| N  | -2.283058000 | 0.584881000  | -0.666461000 | C | 0.506873000  | 2.242905000  | 1.186599000  |
| C  | -1.850910000 | -3.791673000 | 1.490593000  | C | 0.904911000  | 2.520489000  | -0.148149000 |
| H  | -1.428650000 | -4.669586000 | 1.963826000  | C | 1.579941000  | 3.717874000  | -0.463587000 |
| N  | -0.154902000 | 1.058344000  | 1.394668000  | C | 1.926106000  | 3.929394000  | -1.816462000 |
| C  | -3.210563000 | -3.698609000 | 1.251623000  | H | 2.446162000  | 4.836240000  | -2.105811000 |
| H  | -3.882578000 | -4.502285000 | 1.532184000  | C | 1.590505000  | 2.971511000  | -2.758397000 |
| N  | 0.581391000  | 1.575459000  | -1.088874000 | H | 1.839332000  | 3.109856000  | -3.803524000 |
| C  | -3.720578000 | -2.538722000 | 0.630831000  | C | 0.917536000  | 1.801029000  | -2.369453000 |
| Cl | -0.500610000 | -1.235515000 | -2.438805000 | H | 0.628102000  | 1.028242000  | -3.073022000 |
| C  | -2.798630000 | -1.531231000 | 0.277731000  | C | 1.863782000  | 4.637950000  | 0.600931000  |
| C  | -3.244397000 | -0.337226000 | -0.349574000 | H | 2.386802000  | 5.558347000  | 0.363994000  |
| N  | 1.490185000  | -0.921040000 | 0.055214000  | C | 1.484335000  | 4.370417000  | 1.885475000  |
| C  | -4.614835000 | -0.139951000 | -0.620844000 | H | 1.703479000  | 5.076259000  | 2.679598000  |
| N  | 1.825568000  | -1.156835000 | 1.375835000  | C | 2.340494000  | -1.218390000 | -0.922737000 |
| C  | -4.987253000 | 1.071558000  | -1.240527000 | H | 1.970939000  | -1.053345000 | -1.927835000 |
| H  | -6.029495000 | 1.263385000  | -1.470957000 | C | 3.017957000  | -1.656274000 | 1.646799000  |
| C  | -4.008478000 | 1.998840000  | -1.551743000 | H | 3.215906000  | -1.815622000 | 2.701333000  |
| H  | -4.262453000 | 2.935791000  | -2.031793000 | C | 3.996347000  | -1.984863000 | 0.671104000  |
| C  | -2.664567000 | 1.725566000  | -1.256069000 | C | 3.626126000  | -1.762967000 | -0.682696000 |
| H  | -1.880201000 | 2.425906000  | -1.507908000 | C | 4.532255000  | -2.086062000 | -1.718918000 |
| C  | -5.538459000 | -1.176878000 | -0.258888000 | H | 4.244195000  | -1.925258000 | -2.752429000 |
| H  | -6.591170000 | -1.029771000 | -0.475132000 | C | 5.769105000  | -2.608650000 | -1.399425000 |
| C  | -5.109695000 | -2.326507000 | 0.339011000  | H | 6.469361000  | -2.861625000 | -2.187563000 |
| H  | -5.817650000 | -3.104522000 | 0.603929000  | C | 6.138360000  | -2.823956000 | -0.050263000 |
| C  | -0.549648000 | 0.764454000  | 2.641931000  | H | 7.115923000  | -3.236120000 | 0.173384000  |
| H  | -1.051871000 | -0.183345000 | 2.775646000  | C | 5.266467000  | -2.518816000 | 0.976299000  |
| C  | -0.312513000 | 1.629097000  | 3.720950000  | H | 5.544491000  | -2.687108000 | 2.011612000  |

***cis*-[Ru(phen)<sub>2</sub>(phthz)Cl]<sup>1+</sup>: <sup>3</sup>MLCT**

E(UPBE1PBE) = -2113.84470328 A.U.

|    |              |              |              |   |              |              |              |
|----|--------------|--------------|--------------|---|--------------|--------------|--------------|
| u  | -0.387198000 | -0.135911000 | -0.364637000 | H | -0.910988000 | 1.152588000  | 4.650276000  |
| N  | -1.632264000 | -1.648490000 | 0.357684000  | C | 0.376099000  | 2.548019000  | 3.588003000  |
| C  | -1.282099000 | -2.836657000 | 0.864191000  | H | 0.591358000  | 3.158911000  | 4.457631000  |
| H  | -0.224067000 | -2.992778000 | 1.021391000  | C | 0.925961000  | 2.875742000  | 2.348519000  |
| N  | -2.246552000 | 0.723233000  | -0.668473000 | C | 0.613734000  | 2.046779000  | 1.234448000  |
| C  | -2.238928000 | -3.808123000 | 1.198363000  | C | 1.095834000  | 2.336306000  | -0.040177000 |
| H  | -1.906732000 | -4.756445000 | 1.601672000  | C | 1.919273000  | 3.476014000  | -0.281928000 |
| N  | -0.216641000 | 0.935699000  | 1.362517000  | C | 2.322215000  | 3.728948000  | -1.592577000 |
| C  | -3.585165000 | -3.548991000 | 1.008482000  | H | 2.945740000  | 4.588765000  | -1.812793000 |
| H  | -4.334522000 | -4.291782000 | 1.259822000  | C | 1.899170000  | 2.870682000  | -2.625323000 |
| N  | 0.714969000  | 1.477670000  | -1.068399000 | H | 2.181838000  | 3.059308000  | -3.653304000 |
| C  | -3.981919000 | -2.301593000 | 0.481971000  | C | 1.107504000  | 1.766503000  | -2.331209000 |
| Cl | -0.554216000 | -1.148938000 | -2.514522000 | H | 0.763804000  | 1.084304000  | -3.100601000 |
| C  | -2.961523000 | -1.379849000 | 0.164334000  | C | 2.253530000  | 4.293753000  | 0.853993000  |
| C  | -3.289140000 | -0.107098000 | -0.370570000 | H | 2.888043000  | 5.159668000  | 0.694526000  |
| N  | 1.436478000  | -1.053073000 | -0.025203000 | C | 1.782817000  | 4.008291000  | 2.102069000  |
| C  | -4.635294000 | 0.262114000  | -0.574634000 | H | 2.041585000  | 4.645397000  | 2.941653000  |
| N  | 1.591205000  | -1.609306000 | 1.222140000  | C | 2.416338000  | -1.073781000 | -0.921498000 |
| C  | -4.878746000 | 1.549919000  | -1.097923000 | H | 2.189290000  | -0.647637000 | -1.889230000 |
| H  | -5.897946000 | 1.876192000  | -1.274267000 | C | 2.764156000  | -2.125993000 | 1.538287000  |
| C  | -3.810278000 | 2.384112000  | -1.383925000 | H | 2.826738000  | -2.538716000 | 2.538882000  |
| H  | -3.971347000 | 3.375501000  | -1.788018000 | C | 3.883109000  | -2.171035000 | 0.662854000  |
| C  | -2.498017000 | 1.942313000  | -1.160720000 | C | 3.685665000  | -1.633003000 | -0.639415000 |
| H  | -1.639437000 | 2.560335000  | -1.385885000 | C | 4.741905000  | -1.662913000 | -1.578357000 |
| C  | -5.660058000 | -0.687274000 | -0.246458000 | H | 4.589077000  | -1.256030000 | -2.572243000 |
| H  | -6.695425000 | -0.408691000 | -0.409611000 | C | 5.955690000  | -2.211464000 | -1.215081000 |
| C  | -5.345979000 | -1.917410000 | 0.255956000  | H | 6.771630000  | -2.238471000 | -1.928404000 |
| H  | -6.129274000 | -2.628197000 | 0.495846000  | C | 6.151685000  | -2.743291000 | 0.080888000  |
| C  | -0.746225000 | 0.651592000  | 2.583762000  | H | 7.114624000  | -3.168304000 | 0.340537000  |
| H  | -1.381854000 | -0.222687000 | 2.638060000  | C | 5.130712000  | -2.726991000 | 1.012299000  |
| C  | -0.472310000 | 1.420572000  | 3.697520000  | H | 5.277617000  | -3.136506000 | 2.006207000  |

***cis*-[Ru(phen)<sub>2</sub>(phthz)Cl]<sup>1+</sup>: <sup>3</sup>MC**

E(UPBE1PBE) = -2113.83014258 A.U.

|    |              |              |              |   |              |              |              |
|----|--------------|--------------|--------------|---|--------------|--------------|--------------|
| Ru | -0.443246000 | -0.050651000 | -0.341354000 | H | -0.874985000 | 2.035898000  | 4.464990000  |
| N  | -1.653336000 | -1.502448000 | 0.582644000  | C | 0.352615000  | 3.247854000  | 3.177781000  |
| C  | -1.142199000 | -2.566337000 | 1.219924000  | H | 0.570852000  | 3.998059000  | 3.930335000  |
| H  | -0.066313000 | -2.576088000 | 1.331772000  | C | 0.891039000  | 3.377919000  | 1.880960000  |
| N  | -2.682006000 | 0.689826000  | -0.648158000 | C | 0.575939000  | 2.369023000  | 0.944932000  |
| C  | -1.944704000 | -3.609490000 | 1.701843000  | C | 1.083289000  | 2.429050000  | -0.378062000 |
| H  | -1.478463000 | -4.446020000 | 2.207375000  | C | 1.903836000  | 3.504605000  | -0.780708000 |
| N  | -0.224434000 | 1.302076000  | 1.249463000  | C | 2.363887000  | 3.507407000  | -2.114089000 |
| C  | -3.312761000 | -3.562028000 | 1.510874000  | H | 2.996542000  | 4.314758000  | -2.466744000 |
| H  | -3.953615000 | -4.364097000 | 1.860927000  | C | 1.994608000  | 2.472122000  | -2.957828000 |
| N  | 0.728127000  | 1.404273000  | -1.221095000 | H | 2.329403000  | 2.449260000  | -3.987647000 |
| C  | -3.879140000 | -2.455787000 | 0.843541000  | C | 1.178308000  | 1.432986000  | -2.488465000 |
| Cl | -0.545635000 | -1.427529000 | -2.331020000 | H | 0.868055000  | 0.605950000  | -3.115638000 |
| C  | -3.008882000 | -1.432253000 | 0.398917000  | C | 2.215404000  | 4.522370000  | 0.183124000  |
| C  | -3.547212000 | -0.288344000 | -0.272780000 | H | 2.847362000  | 5.348460000  | -0.125257000 |
| N  | 1.663090000  | -1.114559000 | 0.393550000  | C | 1.731669000  | 4.461796000  | 1.458427000  |
| C  | -4.937585000 | -0.202577000 | -0.522779000 | H | 1.975526000  | 5.238161000  | 2.175804000  |
| N  | 2.354780000  | -0.460219000 | 1.397103000  | C | 2.288182000  | -1.958676000 | -0.417411000 |
| C  | -5.403650000 | 0.938213000  | -1.212481000 | H | 1.666125000  | -2.407395000 | -1.186400000 |
| H  | -6.462010000 | 1.036272000  | -1.430154000 | C | 3.647075000  | -0.701223000 | 1.535601000  |
| C  | -4.507416000 | 1.915671000  | -1.605237000 | H | 4.131758000  | -0.161911000 | 2.342423000  |
| H  | -4.840310000 | 2.797136000  | -2.139421000 | C | 4.392910000  | -1.592837000 | 0.716301000  |
| C  | -3.144907000 | 1.758377000  | -1.297803000 | C | 3.672864000  | -2.252044000 | -0.317100000 |
| H  | -2.413401000 | 2.506342000  | -1.580599000 | C | 4.342365000  | -3.153476000 | -1.175897000 |
| C  | -5.795235000 | -1.259044000 | -0.072482000 | H | 3.788785000  | -3.653482000 | -1.963917000 |
| H  | -6.859405000 | -1.184917000 | -0.269912000 | C | 5.691697000  | -3.383621000 | -0.998796000 |
| C  | -5.286209000 | -2.336276000 | 0.589729000  | H | 6.213851000  | -4.073873000 | -1.651941000 |
| H  | -5.939260000 | -3.132746000 | 0.930232000  | C | 6.408324000  | -2.727108000 | 0.030063000  |
| C  | -0.723418000 | 1.202667000  | 2.488345000  | H | 7.467650000  | -2.925879000 | 0.148752000  |
| H  | -1.347443000 | 0.341832000  | 2.688901000  | C | 5.773027000  | -1.842305000 | 0.878779000  |
| C  | -0.451380000 | 2.159531000  | 3.476022000  | H | 6.320314000  | -1.338691000 | 1.669029000  |

*cis*-[Ru(phen)<sub>2</sub>(phthz)Cl]<sup>1+</sup>: <sup>3</sup>TS

E(UPBE1PBE) = -2113.82815427 A.U.

|    |              |              |              |   |              |              |              |
|----|--------------|--------------|--------------|---|--------------|--------------|--------------|
| Ru | -0.346177000 | -0.077757000 | -0.224422000 | H | -1.274236000 | 2.402865000  | 4.385648000  |
| N  | -1.516299000 | -1.522096000 | 0.692375000  | C | -0.007468000 | 3.567549000  | 3.092348000  |
| C  | -1.012686000 | -2.511981000 | 1.446767000  | H | 0.140010000  | 4.374578000  | 3.802009000  |
| H  | 0.050670000  | -2.470182000 | 1.637895000  | C | 0.604059000  | 3.630819000  | 1.821995000  |
| N  | -2.538425000 | 0.529381000  | -0.761622000 | C | 0.378219000  | 2.550641000  | 0.940087000  |
| C  | -1.808181000 | -3.547266000 | 1.954121000  | C | 0.977386000  | 2.534792000  | -0.348256000 |
| H  | -1.348186000 | -4.321019000 | 2.556058000  | C | 1.774938000  | 3.619072000  | -0.775911000 |
| N  | -0.416409000 | 1.486006000  | 1.264725000  | C | 2.326014000  | 3.551820000  | -2.073182000 |
| C  | -3.160122000 | -3.574544000 | 1.666336000  | H | 2.941805000  | 4.365235000  | -2.441518000 |
| H  | -3.792812000 | -4.375062000 | 2.034143000  | C | 2.066758000  | 2.442486000  | -2.859770000 |
| N  | 0.745168000  | 1.429562000  | -1.130547000 | H | 2.467771000  | 2.365960000  | -3.862969000 |
| C  | -3.719244000 | -2.547419000 | 0.878133000  | C | 1.278347000  | 1.392997000  | -2.363675000 |
| Cl | -0.526379000 | -1.408245000 | -2.349957000 | H | 1.045684000  | 0.510352000  | -2.947990000 |
| C  | -2.859980000 | -1.523345000 | 0.414558000  | C | 1.983005000  | 4.713916000  | 0.128819000  |
| C  | -3.392075000 | -0.454107000 | -0.371600000 | H | 2.599366000  | 5.543958000  | -0.199885000 |
| N  | 1.614616000  | -1.084625000 | 0.200807000  | C | 1.428687000  | 4.717178000  | 1.376479000  |
| C  | -4.763928000 | -0.443025000 | -0.717761000 | H | 1.602000000  | 5.547690000  | 2.052566000  |
| N  | 2.141254000  | -0.693311000 | 1.417609000  | C | 2.339498000  | -1.768554000 | -0.674445000 |
| C  | -5.222106000 | 0.625219000  | -1.519085000 | H | 1.819829000  | -2.039520000 | -1.589077000 |
| H  | -6.265546000 | 0.663784000  | -1.813738000 | C | 3.394043000  | -1.010443000 | 1.691104000  |
| C  | -4.336162000 | 1.607230000  | -1.923796000 | H | 3.749346000  | -0.681094000 | 2.661434000  |
| H  | -4.662439000 | 2.432247000  | -2.545071000 | C | 4.250359000  | -1.731935000 | 0.813884000  |
| C  | -2.992877000 | 1.527721000  | -1.518315000 | C | 3.689121000  | -2.131348000 | -0.430494000 |
| H  | -2.269196000 | 2.278109000  | -1.813590000 | C | 4.473578000  | -2.862767000 | -1.351096000 |
| C  | -5.610716000 | -1.499773000 | -0.247828000 | H | 4.041147000  | -3.169977000 | -2.297556000 |
| H  | -6.660936000 | -1.484373000 | -0.519395000 | C | 5.779053000  | -3.177604000 | -1.030532000 |
| C  | -5.109074000 | -2.505143000 | 0.523962000  | H | 6.387546000  | -3.739519000 | -1.730267000 |
| H  | -5.754147000 | -3.301575000 | 0.879278000  | C | 6.337675000  | -2.776709000 | 0.205953000  |
| C  | -0.983397000 | 1.449641000  | 2.478392000  | H | 7.365271000  | -3.037030000 | 0.433750000  |
| H  | -1.606307000 | 0.591009000  | 2.694333000  | C | 5.587329000  | -2.063511000 | 1.120501000  |
| C  | -0.793064000 | 2.473108000  | 3.417866000  | H | 6.012322000  | -1.757665000 | 2.070992000  |
